# Supplementary material for: miRGTF-net: Integrative miRNA-gene-TF network analysis reveals key drivers of breast cancer recurrence
Source: PLoS One. 2021 Apr 14;16(4):e0249424. doi: 10.1371/journal.pone.0249424 (PMC8046230; doi:10.1371/journal.pone.0249424)
Supplement: S3 Table — (XLS) [file pone.0249424.s004.xls]

## Sheet: Overview
Abbreviations:
AUC — Area Under the ROC Curve
TPR — True Positive Rate (sensitivity)
TNR — True Negative Rate (specificity)
Datasets:
GEO accession	Role	Platform
GSE1456	Validation set	Affymetrix Human Genome U133A Array
GSE3494	Training set	Affymetrix Human Genome U133A Array
GSE6532	Training set	Affymetrix Human Genome U133A Array
GSE12093	Filtration set	Affymetrix Human Genome U133A Array
GSE17705	Filtration set	Affymetrix Human Genome U133A Array
GSE6532	Filtration set	Affymetrix Human Genome U133 Plus 2.0 Array
GSE20685	Training set	Affymetrix Human Genome U133 Plus 2.0 Array
TCGA-BRCA	Cross-validation	RNA-seq	Note: some gene symbols were not available in RNA-seq data

## Sheet: Genes from the network
n	k	Signature	GSE1456, AUC	GSE1456, TPR	GSE1456, TNR	GSE3494, AUC	GSE3494, TPR	GSE3494, TNR	GSE6532, AUC	GSE6532, TPR	GSE6532, TNR	GSE12093, AUC	GSE12093, TPR	GSE12093, TNR	GSE17705, AUC	GSE17705, TPR	GSE17705, TNR	GSE6532, AUC	GSE6532, TPR	GSE6532, TNR	GSE20685, AUC	GSE20685, TPR	GSE20685, TNR	TCGA-BRCA, AUC	TCGA-BRCA, TPR	TCGA-BRCA, TNR
206	3	BARD1, PLD1, RACGAP1	0.76	0.75	0.68	0.7	0.67	0.74	0.81	0.67	0.82	0.8	0.83	0.7	0.7	0.73	0.65	0.65	0.77	0.41	0.67	0.64	0.57	0.59	0.5	0.64
206	3	HLA-DPB1, KIF2C, PTPRN2	0.7	0.46	0.72	0.72	0.73	0.67	0.75	0.7	0.76	0.71	0.67	0.68	0.65	0.69	0.65	0.78	0.69	0.65	0.67	0.55	0.68	0.67	0.6	0.69
72	4	ABCA1, ASPM, FOXM1, STAT3	0.74	0.58	0.72	0.68	0.67	0.74	0.83	0.73	0.84	0.8	0.83	0.7	0.68	0.65	0.66	0.69	0.69	0.65	0.68	0.7	0.61	0.59	0.56	0.55
72	4	ABCA1, CBX7, CTCF, FOXM1	0.78	0.75	0.68	0.7	0.67	0.69	0.77	0.73	0.71	0.76	0.83	0.67	0.69	0.69	0.69	0.75	0.85	0.63	0.67	0.61	0.7	0.58	0.64	0.45
72	4	ABCA1, CCNB1, FOS, FOXM1	0.75	0.75	0.69	0.72	0.67	0.71	0.78	0.67	0.73	0.78	0.83	0.68	0.7	0.65	0.67	0.75	0.77	0.59	0.67	0.58	0.7	0.67	0.62	0.61
72	4	ABCA1, CCNB1, FOXM1, STAT3	0.75	0.62	0.74	0.71	0.67	0.74	0.81	0.73	0.78	0.8	0.75	0.7	0.68	0.69	0.65	0.25	0.77	0.59	0.32	0.58	0.71	0.61	0.51	0.66
72	4	ABCA1, CTCF, FOXM1, PLK1	0.8	0.62	0.76	0.68	0.7	0.69	0.79	0.73	0.73	0.76	0.67	0.7	0.67	0.65	0.7	0.77	0.92	0.57	0.69	0.7	0.64	0.61	0.61	0.54
72	4	ABCA1, E2F8, FOXM1, PLK1	0.79	0.62	0.75	0.66	0.67	0.74	0.79	0.67	0.78	0.76	0.75	0.71	0.68	0.65	0.68	0.76	0.92	0.57	0.69	0.67	0.62	0.61	0.59	0.58
72	4	ABCA1, EVL, PLK1, XPC	0.72	0.75	0.54	0.7	0.67	0.74	0.82	0.7	0.76	0.69	0.67	0.71	0.68	0.65	0.66	0.57	0.31	0.63	0.68	0.42	0.78	0.61	0.57	0.57
72	4	ABCA1, FOXM1, PLK1, RRM2	0.79	0.75	0.71	0.7	0.67	0.71	0.77	0.7	0.73	0.76	0.75	0.7	0.7	0.69	0.66	0.77	0.85	0.61	0.69	0.7	0.6	0.61	0.64	0.54
72	4	ASF1B, ATP2A2, GSK3B, XPC	0.68	0.75	0.5	0.68	0.67	0.67	0.8	0.7	0.71	0.73	0.75	0.68	0.71	0.69	0.68	0.38	0	1	0.36	0.03	1	0.49	0.42	0.57
72	4	ASF1B, GSK3B, PIK3CA, XPC	0.67	0.75	0.46	0.68	0.7	0.71	0.8	0.73	0.67	0.73	0.75	0.71	0.72	0.77	0.65	0.71	0.46	0.86	0.6	0.33	0.74	0.49	0.39	0.61
72	4	ASPM, CDC6, MSH2, XPC	0.77	0.71	0.68	0.68	0.67	0.71	0.8	0.73	0.78	0.73	0.75	0.67	0.7	0.69	0.65	0.62	0.77	0.33	0.66	0.67	0.59	0.52	0.62	0.4
72	4	ATAD2, CBX7, EGR3, KIF2C	0.73	0.75	0.64	0.68	0.67	0.69	0.76	0.67	0.69	0.73	0.67	0.73	0.71	0.69	0.65	0.32	0.31	0.88	0.36	0.24	0.95	0.66	0.71	0.59
72	4	ATAD2, FOXM1, RACGAP1, TMPO	0.77	0.67	0.68	0.69	0.67	0.69	0.81	0.8	0.71	0.79	0.83	0.67	0.7	0.69	0.68	0.77	0.69	0.65	0.71	0.76	0.67	0.7	0.56	0.7
72	4	ATP2A2, FOXM1, HNRNPA2B1, XPC	0.74	0.62	0.71	0.68	0.67	0.67	0.81	0.67	0.8	0.79	0.83	0.65	0.69	0.69	0.68	0.3	0	1	0.33	0.12	0.98	0.6	0.62	0.49
72	4	AURKB, FOXM1, RACGAP1, TMPO	0.77	0.71	0.72	0.69	0.67	0.74	0.81	0.77	0.73	0.79	0.83	0.68	0.68	0.69	0.65	0.76	0.85	0.61	0.73	0.79	0.65	0.69	0.63	0.63
72	4	CDC6, CSF1, MDC1, XPC	0.66	0.67	0.46	0.69	0.7	0.71	0.75	0.67	0.73	0.7	0.75	0.65	0.71	0.69	0.65	0.63	0.38	0.78	0.63	0.42	0.8	0.61	0.56	0.69
72	4	CSF1, FOXM1, HNRNPA2B1, XPC	0.74	0.58	0.69	0.68	0.67	0.67	0.82	0.73	0.78	0.79	0.75	0.65	0.71	0.69	0.72	0.75	0.85	0.67	0.68	0.55	0.7	0.64	0.59	0.67
72	4	E2F8, FOXM1, PTTG1, XPC	0.76	0.67	0.75	0.66	0.7	0.69	0.8	0.67	0.8	0.75	0.75	0.65	0.69	0.73	0.67	0.74	0.85	0.57	0.67	0.64	0.61	0.59	0.64	0.46
72	4	EGR3, FOXM1, LRIG2, XPC	0.76	0.75	0.64	0.67	0.7	0.69	0.81	0.67	0.78	0.8	0.92	0.65	0.72	0.65	0.68	0.76	0.69	0.59	0.67	0.52	0.71	0.66	0.7	0.55
42	5	ABCA1, ATAD2, CCNB1, FOS, FOXM1	0.77	0.75	0.69	0.73	0.67	0.67	0.77	0.7	0.76	0.78	0.83	0.68	0.7	0.65	0.66	0.76	0.92	0.51	0.68	0.67	0.64	0.7	0.66	0.65
42	5	ABCA1, ATAD2, CCNB1, FOXM1, MSH2	0.81	0.75	0.74	0.7	0.67	0.71	0.76	0.67	0.78	0.77	0.75	0.68	0.68	0.69	0.65	0.74	0.92	0.39	0.69	0.67	0.62	0.59	0.54	0.61
42	5	ABCA1, ATAD2, CTCF, FOXM1, PLK1	0.8	0.67	0.76	0.68	0.7	0.69	0.79	0.73	0.73	0.76	0.67	0.7	0.67	0.65	0.7	0.25	0.38	0.78	0.35	0.36	0.81	0.61	0.61	0.55
42	5	ABCA1, ATAD2, FOXM1, PLK1, RRM2	0.79	0.75	0.71	0.7	0.67	0.71	0.77	0.7	0.76	0.77	0.75	0.68	0.7	0.69	0.65	0.75	0.85	0.61	0.7	0.73	0.67	0.63	0.59	0.55
42	5	ABCA1, ATM, CBX7, FOXM1, RRM2	0.78	0.79	0.69	0.7	0.67	0.71	0.77	0.67	0.73	0.78	0.83	0.71	0.71	0.65	0.69	0.25	0.85	0.47	0.35	0.3	0.82	0.62	0.68	0.54
42	5	ABCA1, AURKB, E2F8, FOXM1, PLK1	0.79	0.67	0.74	0.66	0.67	0.69	0.8	0.67	0.78	0.76	0.83	0.73	0.68	0.65	0.72	0.72	0.85	0.55	0.72	0.64	0.72	0.66	0.55	0.65
42	5	ABCA1, AURKB, FOS, FOXM1, TMPO	0.75	0.75	0.68	0.71	0.67	0.69	0.81	0.73	0.73	0.77	0.83	0.68	0.69	0.65	0.69	0.76	0.85	0.67	0.73	0.79	0.64	0.66	0.65	0.58
42	5	ABCA1, CBX7, CCNB1, FOS, FOXM1	0.76	0.75	0.68	0.72	0.67	0.71	0.78	0.67	0.73	0.78	0.83	0.7	0.7	0.65	0.68	0.29	0.85	0.65	0.33	0.36	0.77	0.66	0.58	0.61
42	5	ABCA1, CBX7, CTCF, FOXM1, MSH2	0.78	0.79	0.69	0.7	0.67	0.71	0.77	0.7	0.73	0.77	0.83	0.67	0.69	0.65	0.66	0.32	0.77	0.49	0.33	0.42	0.83	0.56	0.63	0.43
42	5	ABCA1, CCNA2, E2F8, FOXM1, PLK1	0.8	0.67	0.75	0.66	0.67	0.74	0.8	0.67	0.8	0.75	0.75	0.71	0.69	0.65	0.68	0.77	0.62	0.75	0.72	0.64	0.72	0.6	0.64	0.52
42	5	ABCA1, CCNB1, EZH2, FOS, FOXM1	0.76	0.75	0.69	0.71	0.67	0.71	0.78	0.7	0.73	0.78	0.83	0.68	0.7	0.65	0.67	0.26	0.77	0.65	0.34	0.48	0.77	0.66	0.64	0.6
42	5	ABCA1, CCNB1, FOS, FOXM1, LRIG2	0.76	0.75	0.69	0.72	0.67	0.71	0.78	0.7	0.69	0.78	0.83	0.68	0.7	0.69	0.67	0.25	0.69	0.78	0.33	0.36	0.79	0.67	0.64	0.6
42	5	ABCA1, CCNB1, FOS, FOXM1, TMPO	0.76	0.75	0.69	0.71	0.7	0.71	0.79	0.7	0.69	0.78	0.83	0.68	0.7	0.65	0.68	0.75	0.69	0.63	0.72	0.73	0.62	0.72	0.68	0.62
42	5	ABCA1, CDC6, KIF2C, PTTG1, RAD51	0.78	0.71	0.71	0.67	0.67	0.76	0.76	0.7	0.71	0.76	0.83	0.73	0.7	0.65	0.69	0.72	0.92	0.49	0.68	0.64	0.64	0.58	0.65	0.46
42	5	ABCA1, CDK1, FOS, FOXM1, LRIG2	0.75	0.67	0.67	0.71	0.67	0.71	0.8	0.73	0.71	0.79	0.83	0.71	0.7	0.65	0.67	0.76	0.46	0.84	0.71	0.64	0.73	0.7	0.66	0.63
42	5	ABCA1, CDK1, FOS, FOXM1, PTTG1	0.75	0.67	0.69	0.71	0.67	0.67	0.79	0.7	0.76	0.78	0.83	0.68	0.7	0.69	0.65	0.77	0.62	0.73	0.69	0.61	0.69	0.7	0.68	0.62
42	5	ABCA1, CTCF, FOXM1, PCNA, PLK1	0.8	0.67	0.78	0.69	0.7	0.69	0.78	0.73	0.73	0.75	0.67	0.71	0.67	0.65	0.69	0.8	0.85	0.69	0.71	0.64	0.8	0.64	0.58	0.63
42	5	ABCA1, E2F8, FOS, FOXM1, PLK1	0.76	0.62	0.72	0.71	0.67	0.69	0.8	0.7	0.76	0.76	0.83	0.73	0.7	0.73	0.67	0.76	0.92	0.57	0.69	0.64	0.62	0.66	0.6	0.63
42	5	ABCA1, E2F8, FOXM1, KIF2C, PLK1	0.79	0.62	0.75	0.67	0.67	0.74	0.79	0.67	0.78	0.76	0.83	0.71	0.68	0.65	0.71	0.75	0.85	0.59	0.67	0.67	0.63	0.62	0.56	0.61
42	5	ABCA1, E2F8, FOXM1, PLK1, PTTG1	0.79	0.62	0.75	0.66	0.67	0.74	0.79	0.67	0.78	0.76	0.75	0.71	0.68	0.65	0.68	0.76	0.92	0.61	0.69	0.7	0.63	0.6	0.62	0.52
42	5	ABCA1, FOS, FOXM1, KIF2C, PLK1	0.78	0.67	0.76	0.71	0.67	0.76	0.79	0.67	0.76	0.78	0.75	0.74	0.69	0.65	0.66	0.78	0.92	0.61	0.69	0.73	0.62	0.67	0.63	0.6
42	5	ABCA1, FOS, FOXM1, KIF2C, TMPO	0.73	0.67	0.71	0.72	0.67	0.69	0.8	0.7	0.71	0.79	0.83	0.73	0.7	0.65	0.72	0.76	0.69	0.67	0.72	0.73	0.66	0.68	0.64	0.6
42	5	ABCA1, FOS, FOXM1, PLK1, TMPO	0.77	0.67	0.71	0.72	0.73	0.67	0.82	0.83	0.65	0.76	0.83	0.7	0.7	0.69	0.65	0.77	0.77	0.65	0.71	0.76	0.66	0.71	0.66	0.63
42	5	ABCA1, FOXM1, PLK1, PTTG1, RRM2	0.78	0.79	0.71	0.7	0.67	0.71	0.76	0.7	0.73	0.76	0.75	0.68	0.7	0.65	0.69	0.75	0.85	0.57	0.66	0.64	0.63	0.6	0.62	0.54
42	5	ABCA1, KIF2C, MSH2, RAD51, RRM2	0.75	0.83	0.62	0.71	0.67	0.71	0.74	0.7	0.67	0.75	0.83	0.73	0.71	0.65	0.72	0.75	0.92	0.31	0.67	0.64	0.61	0.56	0.59	0.47
42	5	ASPM, ATAD2, CDC6, FOXM1, XPC	0.78	0.67	0.75	0.68	0.67	0.74	0.8	0.73	0.86	0.77	0.83	0.68	0.7	0.65	0.68	0.3	0.69	0.69	0.33	0.52	0.77	0.56	0.49	0.57
42	5	ASPM, ATAD2, FOXM1, KIF2C, XPC	0.78	0.62	0.76	0.67	0.67	0.67	0.8	0.73	0.86	0.78	0.83	0.67	0.71	0.65	0.71	0.76	0.77	0.63	0.67	0.61	0.66	0.57	0.6	0.48
42	5	ASPM, CBX7, CCNE1, KIF2C, PCNA	0.79	0.62	0.82	0.7	0.67	0.74	0.76	0.73	0.65	0.75	0.75	0.71	0.68	0.65	0.67	0.68	0.85	0.39	0.67	0.76	0.44	0.58	0.6	0.53
42	5	ASPM, CD2AP, FOS, KIF2C, MSH2	0.73	0.67	0.74	0.71	0.67	0.71	0.81	0.83	0.69	0.8	0.83	0.67	0.67	0.65	0.7	0.69	0.85	0.31	0.67	0.7	0.57	0.67	0.61	0.59
42	5	ASPM, CDC6, E2F8, KIF2C, MSH2	0.78	0.71	0.74	0.65	0.67	0.74	0.79	0.7	0.73	0.73	0.83	0.68	0.7	0.65	0.68	0.7	0.85	0.57	0.68	0.52	0.7	0.57	0.52	0.57
42	5	ASPM, E2F8, EZH2, FOXM1, XPC	0.77	0.67	0.72	0.65	0.67	0.67	0.81	0.77	0.82	0.76	0.75	0.68	0.73	0.65	0.77	0.74	0.85	0.59	0.68	0.64	0.61	0.57	0.53	0.54
42	5	ATAD2, E2F8, FOXM1, PTTG1, XPC	0.77	0.67	0.76	0.66	0.7	0.69	0.8	0.67	0.78	0.75	0.75	0.65	0.69	0.73	0.67	0.26	0.77	0.63	0.34	0.55	0.68	0.58	0.64	0.46
42	5	ATP2A2, FOS, FOXM1, LRIG2, XPC	0.76	0.75	0.71	0.71	0.67	0.74	0.8	0.7	0.8	0.77	0.83	0.65	0.71	0.65	0.67	0.72	0.31	0.88	0.68	0.55	0.66	0.64	0.58	0.59
42	5	AURKB, CCNB1, FOXM1, RACGAP1, TMPO	0.77	0.71	0.72	0.69	0.67	0.74	0.81	0.77	0.73	0.79	0.83	0.68	0.68	0.69	0.65	0.75	0.85	0.55	0.74	0.79	0.61	0.69	0.64	0.62
42	5	AURKB, FOXM1, HNRNPA2B1, RACGAP1, TMPO	0.76	0.71	0.69	0.69	0.67	0.69	0.81	0.73	0.71	0.79	0.83	0.7	0.68	0.65	0.67	0.75	0.85	0.57	0.74	0.79	0.64	0.64	0.64	0.59
42	5	AURKB, FOXM1, RACGAP1, TMPO, TOP2A	0.77	0.71	0.72	0.69	0.67	0.74	0.81	0.77	0.73	0.79	0.83	0.68	0.68	0.69	0.65	0.75	0.85	0.53	0.74	0.82	0.63	0.67	0.6	0.63
42	5	CBX7, CDK1, E2F8, FOXM1, XPC	0.77	0.67	0.75	0.66	0.67	0.67	0.81	0.67	0.84	0.77	0.75	0.65	0.7	0.77	0.67	0.76	0.62	0.75	0.73	0.64	0.64	0.62	0.53	0.6
42	5	CBX7, FOXM1, HNRNPA2B1, RACGAP1, TMPO	0.76	0.71	0.69	0.69	0.67	0.69	0.81	0.73	0.69	0.79	0.83	0.7	0.68	0.65	0.66	0.31	0.69	0.63	0.34	0.48	0.7	0.67	0.59	0.65
42	5	CCNB1, E2F8, FOXM1, HNRNPA2B1, PCNA	0.77	0.67	0.79	0.71	0.67	0.69	0.77	0.7	0.78	0.73	0.75	0.68	0.67	0.69	0.68	0.75	0.69	0.69	0.7	0.61	0.69	0.65	0.66	0.59
42	5	CDC6, E2F8, FOXM1, RACGAP1, TMPO	0.76	0.71	0.72	0.68	0.67	0.74	0.81	0.73	0.76	0.77	0.92	0.73	0.69	0.73	0.65	0.74	0.54	0.76	0.72	0.7	0.7	0.7	0.58	0.71
42	5	CDC6, FMR1, FOXM1, XPC, ZNF143	0.75	0.46	0.76	0.67	0.67	0.67	0.82	0.73	0.84	0.79	0.75	0.7	0.72	0.65	0.73	0.74	0.77	0.63	0.7	0.79	0.53	0.6	0.56	0.62
42	5	CTCF, FOS, FOXM1, MAD2L1, PCNA	0.76	0.71	0.74	0.77	0.67	0.76	0.8	0.7	0.78	0.7	0.75	0.7	0.67	0.69	0.66	0.76	0.69	0.69	0.7	0.58	0.76	0.67	0.62	0.61
42	5	E2F8, FOXM1, KIF2C, PCNA, RACGAP1	0.76	0.71	0.72	0.69	0.67	0.74	0.81	0.7	0.73	0.76	0.83	0.67	0.69	0.69	0.67	0.77	0.69	0.73	0.71	0.67	0.7	0.58	0.54	0.62
42	5	E2F8, FOXM1, PCNA, RACGAP1, TMPO	0.76	0.67	0.69	0.71	0.67	0.71	0.81	0.7	0.73	0.77	0.92	0.65	0.67	0.65	0.66	0.77	0.46	0.84	0.74	0.7	0.77	0.67	0.6	0.68
42	5	E2F8, FOXM1, PLK1, RACGAP1, TMPO	0.76	0.71	0.76	0.68	0.67	0.74	0.81	0.7	0.73	0.77	0.92	0.73	0.69	0.73	0.66	0.75	0.69	0.63	0.71	0.7	0.62	0.67	0.68	0.61
42	5	E2F8, PCNA, PTTG1, TOP2A, XPC	0.76	0.67	0.72	0.68	0.67	0.74	0.79	0.7	0.8	0.73	0.75	0.67	0.7	0.65	0.74	0.77	0.62	0.78	0.7	0.64	0.63	0.56	0.66	0.44
30	6	ASPM, ATAD2, CDC6, CDK1, FOXM1, XPC	0.78	0.71	0.75	0.69	0.67	0.69	0.81	0.73	0.82	0.78	0.83	0.65	0.7	0.77	0.66	0.29	0.77	0.63	0.34	0.52	0.74	0.59	0.54	0.57
30	6	ASPM, ATAD2, CDC6, E2F8, MSH2, XPC	0.77	0.75	0.68	0.68	0.7	0.71	0.82	0.77	0.8	0.73	0.83	0.65	0.71	0.69	0.67	0.32	0.77	0.55	0.34	0.48	0.73	0.54	0.41	0.62
30	6	ASPM, ATAD2, CDC6, FOXM1, KIF2C, XPC	0.79	0.75	0.71	0.68	0.67	0.67	0.8	0.73	0.8	0.78	0.83	0.67	0.71	0.73	0.67	0.29	0.77	0.61	0.34	0.55	0.68	0.56	0.61	0.46
30	6	ASPM, ATAD2, CDC6, FOXM1, MSH2, XPC	0.78	0.67	0.75	0.68	0.67	0.74	0.8	0.73	0.86	0.77	0.83	0.68	0.71	0.65	0.68	0.69	0.77	0.53	0.67	0.52	0.76	0.54	0.65	0.41
30	6	ASPM, ATAD2, CDC6, FOXM1, RRM2, XPC	0.78	0.71	0.72	0.69	0.67	0.74	0.8	0.7	0.84	0.77	0.83	0.68	0.71	0.77	0.68	0.28	0.77	0.63	0.34	0.55	0.7	0.55	0.59	0.46
30	6	ASPM, ATAD2, CDC6, FOXM1, XPC, ZNF143	0.77	0.67	0.74	0.67	0.67	0.71	0.8	0.73	0.86	0.77	0.83	0.68	0.71	0.65	0.68	0.3	0.69	0.69	0.33	0.52	0.77	0.58	0.7	0.43
30	6	ASPM, ATAD2, E2F8, FOXM1, RAD51, XPC	0.79	0.71	0.78	0.65	0.7	0.74	0.83	0.7	0.84	0.76	0.75	0.68	0.72	0.69	0.74	0.26	0.77	0.59	0.33	0.58	0.7	0.56	0.54	0.55
30	6	ASPM, CDC6, E2F8, MSH2, PTTG1, XPC	0.77	0.71	0.72	0.68	0.67	0.76	0.82	0.73	0.73	0.72	0.75	0.67	0.72	0.65	0.69	0.68	0.77	0.51	0.67	0.58	0.71	0.56	0.67	0.4
30	6	ASPM, CDC6, E2F8, MSH2, RRM2, XPC	0.77	0.75	0.71	0.68	0.67	0.71	0.82	0.73	0.73	0.72	0.75	0.68	0.72	0.65	0.69	0.32	0.77	0.53	0.33	0.52	0.73	0.54	0.54	0.51
30	6	ASPM, E2F8, FOXM1, LRIG2, MSH2, ZNF143	0.78	0.67	0.78	0.65	0.67	0.74	0.8	0.67	0.73	0.77	0.75	0.67	0.67	0.65	0.71	0.27	0.77	0.63	0.32	0.48	0.73	0.61	0.7	0.47
30	6	ASPM, E2F8, FOXM1, MSH2, PTTG1, XPC	0.77	0.67	0.75	0.65	0.67	0.74	0.81	0.7	0.84	0.76	0.75	0.67	0.71	0.65	0.74	0.79	0.62	0.8	0.7	0.67	0.53	0.57	0.68	0.4
30	6	ASPM, E2F8, FOXM1, RACGAP1, TMPO, TOP2A	0.76	0.71	0.72	0.68	0.67	0.74	0.81	0.73	0.76	0.78	0.92	0.71	0.69	0.65	0.68	0.75	0.69	0.75	0.72	0.73	0.66	0.67	0.58	0.66
30	6	ASPM, E2F8, MSH2, RAD51, TOP2A, XPC	0.78	0.67	0.72	0.66	0.67	0.69	0.83	0.7	0.8	0.75	0.75	0.67	0.72	0.69	0.72	0.69	0.77	0.51	0.67	0.58	0.7	0.56	0.58	0.52
30	6	ATAD2, CCNB1, CD2AP, FOXM1, PLK1, PTTG1	0.79	0.71	0.79	0.69	0.67	0.71	0.78	0.67	0.67	0.76	0.83	0.71	0.68	0.65	0.67	0.72	0.62	0.67	0.66	0.48	0.74	0.63	0.6	0.58
30	6	ATAD2, E2F8, FOXM1, MSH2, TOP2A, XPC	0.77	0.71	0.74	0.66	0.7	0.69	0.8	0.67	0.86	0.76	0.75	0.7	0.69	0.69	0.73	0.7	0.77	0.59	0.67	0.55	0.73	0.56	0.59	0.51
30	6	ATAD2, FOXM1, KIF2C, MSH2, PLK1, RACGAP1	0.79	0.67	0.72	0.69	0.67	0.76	0.8	0.7	0.69	0.77	0.92	0.7	0.68	0.65	0.68	0.72	0.92	0.57	0.67	0.61	0.65	0.65	0.58	0.66
30	6	ATM, ATP2A2, CLOCK, E2F8, FOXM1, XPC	0.75	0.62	0.76	0.67	0.7	0.67	0.81	0.67	0.86	0.76	0.75	0.67	0.66	0.65	0.72	0.77	0.92	0.31	0.71	0.64	0.64	0.66	0.63	0.65
30	6	ATP2A2, E2F8, FOXM1, MSH2, PTTG1, XPC	0.77	0.62	0.79	0.65	0.67	0.74	0.8	0.67	0.84	0.75	0.75	0.68	0.69	0.69	0.71	0.71	0.46	0.8	0.68	0.45	0.78	0.57	0.64	0.42
30	6	ATP2A2, E2F8, FOXM1, PTTG1, RRM2, XPC	0.77	0.71	0.76	0.65	0.67	0.69	0.79	0.67	0.78	0.76	0.75	0.67	0.69	0.73	0.67	0.27	0.62	0.75	0.33	0.58	0.67	0.56	0.63	0.44
30	6	CCNB1, CDC6, E2F8, FOXM1, RACGAP1, TMPO	0.75	0.67	0.69	0.68	0.67	0.74	0.81	0.77	0.76	0.78	0.92	0.7	0.69	0.65	0.66	0.74	0.62	0.73	0.72	0.76	0.65	0.72	0.62	0.71
30	6	CCNE1, E2F8, FOXM1, LRIG2, PTTG1, XPC	0.77	0.58	0.79	0.67	0.67	0.69	0.8	0.67	0.8	0.77	0.75	0.7	0.7	0.65	0.76	0.72	0.77	0.53	0.68	0.55	0.69	0.58	0.68	0.42
30	6	CDC6, E2F8, FOXM1, KIF2C, RACGAP1, TMPO	0.76	0.71	0.72	0.69	0.67	0.74	0.81	0.73	0.76	0.78	0.92	0.71	0.69	0.65	0.71	0.73	0.62	0.73	0.73	0.76	0.64	0.69	0.59	0.7
30	6	CDC6, E2F8, FOXM1, MSH6, RACGAP1, TMPO	0.76	0.71	0.72	0.68	0.67	0.74	0.81	0.73	0.76	0.77	0.92	0.7	0.69	0.73	0.66	0.74	0.62	0.73	0.72	0.76	0.65	0.69	0.61	0.7
25	7	ASPM, ATAD2, ATP2A2, CCNE1, E2F8, FOXM1, XPC	0.78	0.58	0.75	0.66	0.7	0.69	0.82	0.73	0.8	0.77	0.75	0.67	0.72	0.65	0.76	0.71	0.85	0.61	0.69	0.64	0.58	0.56	0.55	0.52
25	7	ASPM, ATAD2, CCNB1, CCNE1, KIF2C, MSH2, ZNF143	0.8	0.75	0.72	0.68	0.67	0.71	0.77	0.8	0.67	0.72	0.75	0.68	0.67	0.65	0.68	0.3	0.85	0.35	0.32	0.67	0.54	0.62	0.61	0.55
25	7	ASPM, ATAD2, CCNE1, E2F8, FOXM1, MSH2, XPC	0.79	0.62	0.74	0.66	0.7	0.67	0.82	0.77	0.76	0.77	0.75	0.65	0.71	0.65	0.72	0.71	0.77	0.53	0.68	0.61	0.7	0.56	0.64	0.44
25	7	ASPM, ATAD2, CCNE1, E2F8, FOXM1, PTTG1, XPC	0.77	0.62	0.76	0.65	0.7	0.74	0.81	0.73	0.82	0.77	0.75	0.67	0.71	0.65	0.77	0.72	0.85	0.53	0.67	0.61	0.65	0.57	0.65	0.43
25	7	ASPM, ATAD2, E2F8, FOXM1, KIF2C, MSH2, RACGAP1	0.78	0.75	0.75	0.68	0.67	0.76	0.83	0.7	0.73	0.77	0.92	0.65	0.69	0.69	0.68	0.73	0.85	0.53	0.68	0.64	0.6	0.61	0.56	0.63
25	7	ASPM, ATAD2, E2F8, FOXM1, LRIG2, MSH2, RRM2	0.78	0.71	0.75	0.66	0.7	0.76	0.8	0.67	0.71	0.76	0.75	0.67	0.67	0.69	0.66	0.74	0.77	0.55	0.68	0.61	0.62	0.57	0.67	0.43
25	7	ASPM, ATAD2, E2F8, FOXM1, MSH2, PTTG1, XPC	0.78	0.67	0.74	0.66	0.7	0.69	0.81	0.7	0.8	0.76	0.75	0.67	0.7	0.69	0.73	0.74	0.85	0.49	0.68	0.64	0.62	0.56	0.66	0.4
25	7	ASPM, ATAD2, E2F8, FOXM1, MSH2, RACGAP1, XPC	0.78	0.71	0.71	0.69	0.67	0.76	0.86	0.73	0.8	0.77	0.83	0.65	0.71	0.65	0.78	0.71	0.77	0.55	0.67	0.61	0.65	0.61	0.54	0.63
25	7	ASPM, ATAD2, E2F8, FOXM1, MSH2, RRM2, XPC	0.78	0.67	0.72	0.65	0.67	0.71	0.81	0.7	0.82	0.76	0.75	0.65	0.71	0.69	0.72	0.71	0.77	0.55	0.66	0.58	0.64	0.55	0.61	0.45
25	7	ASPM, ATAD2, E2F8, FOXM1, PTTG1, XPC, ZNF143	0.77	0.58	0.74	0.66	0.7	0.69	0.82	0.73	0.8	0.77	0.83	0.68	0.73	0.65	0.77	0.72	0.77	0.57	0.67	0.58	0.64	0.6	0.69	0.45
25	7	ASPM, CCNB1, E2F8, FOXM1, MSH2, PTTG1, XPC	0.78	0.71	0.71	0.67	0.67	0.67	0.82	0.7	0.82	0.74	0.75	0.67	0.7	0.65	0.73	0.7	0.77	0.39	0.67	0.64	0.59	0.59	0.61	0.5
25	7	ASPM, CCNE1, E2F8, FOXM1, MSH2, RRM2, XPC	0.78	0.67	0.72	0.66	0.7	0.67	0.82	0.7	0.82	0.75	0.75	0.65	0.72	0.69	0.72	0.71	0.85	0.45	0.68	0.64	0.62	0.56	0.63	0.43
25	7	ASPM, E2F8, FOXM1, KIF2C, MSH2, RACGAP1, XPC	0.77	0.75	0.71	0.68	0.7	0.76	0.85	0.73	0.82	0.76	0.75	0.65	0.71	0.65	0.77	0.72	0.77	0.53	0.67	0.61	0.61	0.56	0.48	0.64
25	7	ASPM, E2F8, FOXM1, MSH2, PTTG1, RRM2, XPC	0.78	0.67	0.72	0.65	0.67	0.74	0.81	0.7	0.84	0.76	0.75	0.65	0.71	0.69	0.72	0.74	0.85	0.51	0.67	0.64	0.62	0.57	0.67	0.4
25	7	ATAD2, CCNB1, CDK1, E2F8, FOXM1, RACGAP1, TMPO	0.76	0.71	0.68	0.68	0.67	0.74	0.81	0.73	0.76	0.78	0.92	0.65	0.69	0.65	0.66	0.73	0.54	0.75	0.74	0.7	0.69	0.72	0.59	0.73
25	7	ATAD2, CCNB1, E2F8, FOXM1, PTTG1, RRM2, XPC	0.77	0.71	0.74	0.67	0.67	0.71	0.8	0.67	0.8	0.77	0.83	0.65	0.68	0.69	0.71	0.75	0.69	0.57	0.71	0.73	0.62	0.58	0.54	0.61
25	7	ATAD2, CCNB1, FOXM1, KIF2C, PLK1, RACGAP1, TMPO	0.78	0.67	0.72	0.69	0.67	0.74	0.81	0.77	0.73	0.79	0.83	0.7	0.69	0.65	0.71	0.74	0.77	0.59	0.72	0.82	0.59	0.7	0.62	0.68
25	7	ATAD2, CCNE1, FOXM1, LRIG2, MSH6, RACGAP1, TMPO	0.77	0.67	0.72	0.69	0.67	0.74	0.81	0.8	0.71	0.79	0.83	0.7	0.69	0.69	0.68	0.73	0.85	0.59	0.67	0.55	0.68	0.67	0.62	0.68
25	7	ATAD2, E2F8, FOXM1, MSH2, PTTG1, TOP2A, XPC	0.77	0.67	0.76	0.66	0.7	0.74	0.8	0.67	0.82	0.75	0.75	0.68	0.69	0.69	0.72	0.29	0.77	0.55	0.33	0.61	0.69	0.56	0.67	0.4
25	7	ATP2A2, CCNB1, E2F8, FOXM1, PLK1, RRM2, XPC	0.78	0.62	0.79	0.67	0.67	0.79	0.82	0.7	0.8	0.75	0.75	0.65	0.69	0.69	0.72	0.74	0.62	0.73	0.68	0.64	0.62	0.6	0.59	0.56
25	7	ATP2A2, CCNE1, E2F8, FOXM1, LRIG2, PTTG1, XPC	0.77	0.62	0.78	0.68	0.67	0.69	0.8	0.67	0.8	0.77	0.75	0.7	0.7	0.65	0.76	0.73	0.77	0.69	0.69	0.55	0.71	0.57	0.67	0.43
25	7	ATP2A2, E2F8, FOXM1, LRIG2, PTTG1, RRM2, XPC	0.77	0.67	0.74	0.67	0.67	0.69	0.8	0.67	0.82	0.76	0.75	0.7	0.7	0.65	0.78	0.75	0.54	0.82	0.69	0.67	0.63	0.56	0.67	0.42
25	7	CCNB1, CCNE1, E2F8, FOXM1, PLK1, RRM2, XPC	0.78	0.62	0.79	0.67	0.67	0.76	0.82	0.7	0.82	0.75	0.75	0.67	0.69	0.69	0.72	0.72	0.85	0.55	0.67	0.58	0.68	0.6	0.57	0.58
25	7	CCNB1, CCNE1, E2F8, FOXM1, PTTG1, RRM2, XPC	0.77	0.62	0.78	0.67	0.67	0.74	0.81	0.67	0.84	0.76	0.75	0.67	0.69	0.65	0.75	0.73	0.85	0.53	0.67	0.58	0.63	0.56	0.56	0.56
25	7	CCNB1, E2F8, FOXM1, MAD2L1, MSH6, RACGAP1, TMPO	0.76	0.71	0.69	0.68	0.67	0.74	0.81	0.77	0.82	0.77	0.92	0.71	0.68	0.69	0.69	0.76	0.69	0.75	0.72	0.73	0.65	0.68	0.69	0.59
25	7	CCNE1, E2F8, FOXM1, LRIG2, MSH2, PTTG1, XPC	0.77	0.62	0.79	0.68	0.67	0.74	0.8	0.67	0.8	0.77	0.75	0.67	0.7	0.65	0.71	0.72	0.77	0.53	0.68	0.61	0.71	0.57	0.69	0.41
25	7	CCNE1, E2F8, FOXM1, LRIG2, PTTG1, RRM2, XPC	0.77	0.62	0.78	0.67	0.67	0.69	0.8	0.67	0.82	0.77	0.75	0.7	0.7	0.65	0.76	0.73	0.85	0.53	0.67	0.61	0.69	0.58	0.68	0.42
25	7	CCNE1, E2F8, FOXM1, RACGAP1, TMPO, TOP2A, ZNF143	0.76	0.71	0.74	0.68	0.67	0.74	0.81	0.73	0.76	0.77	0.83	0.73	0.69	0.69	0.66	0.74	0.77	0.63	0.73	0.64	0.69	0.67	0.59	0.67
25	7	E2F8, FOXM1, LRIG2, MSH6, RACGAP1, TMPO, ZNF143	0.76	0.71	0.72	0.68	0.67	0.74	0.81	0.73	0.76	0.77	0.92	0.71	0.68	0.65	0.65	0.75	0.69	0.73	0.72	0.64	0.68	0.68	0.65	0.64
23	8	ASPM, CCNB1, CCNE1, E2F8, FOXM1, MSH2, PTTG1, XPC	0.78	0.71	0.72	0.67	0.67	0.67	0.82	0.67	0.82	0.75	0.75	0.65	0.7	0.65	0.72	0.72	0.85	0.49	0.68	0.64	0.64	0.57	0.59	0.5
23	8	ASPM, CCNB1, CCNE1, E2F8, FOXM1, MSH2, RRM2, XPC	0.78	0.71	0.72	0.67	0.7	0.69	0.82	0.7	0.82	0.74	0.75	0.65	0.7	0.65	0.72	0.71	0.85	0.45	0.68	0.64	0.6	0.57	0.57	0.52
23	8	ASPM, E2F8, FOXM1, MSH2, PTTG1, RRM2, TOP2A, XPC	0.78	0.67	0.72	0.66	0.7	0.74	0.8	0.7	0.82	0.75	0.75	0.67	0.71	0.69	0.76	0.3	0.85	0.45	0.33	0.64	0.58	0.57	0.68	0.38
23	8	ATP2A2, CCNB1, CCNE1, E2F8, FOXM1, MSH2, PLK1, XPC	0.79	0.62	0.79	0.68	0.67	0.74	0.83	0.67	0.82	0.73	0.75	0.67	0.68	0.69	0.67	0.71	0.85	0.59	0.68	0.52	0.66	0.59	0.58	0.52
23	8	ATP2A2, E2F8, FOXM1, KIF2C, MSH2, PTTG1, TOP2A, XPC	0.78	0.71	0.74	0.66	0.67	0.69	0.8	0.7	0.82	0.75	0.75	0.7	0.69	0.65	0.73	0.29	0.85	0.59	0.32	0.67	0.56	0.57	0.68	0.38
23	8	AURKA, CCNB1, FOXM1, LRIG2, PLK1, RACGAP1, RRM2, TMPO	0.76	0.67	0.69	0.69	0.67	0.71	0.83	0.73	0.71	0.8	0.92	0.71	0.67	0.65	0.65	0.72	0.62	0.71	0.72	0.55	0.71	0.69	0.63	0.63
23	8	CDK1, E2F8, FOXM1, KIF2C, MSH2, PTTG1, RACGAP1, TMPO	0.77	0.75	0.72	0.68	0.67	0.76	0.83	0.73	0.73	0.76	0.83	0.67	0.69	0.69	0.66	0.73	0.62	0.75	0.75	0.73	0.65	0.67	0.56	0.69
23	8	CDK1, FOXM1, LRIG2, MSH2, PLK1, RACGAP1, RRM2, TMPO	0.78	0.67	0.71	0.68	0.67	0.79	0.82	0.87	0.71	0.79	0.75	0.65	0.68	0.65	0.66	0.72	0.69	0.67	0.74	0.67	0.73	0.72	0.61	0.73
23	8	CDK1, FOXM1, LRIG2, MSH2, RACGAP1, RRM2, TMPO, TOP2A	0.77	0.67	0.71	0.69	0.67	0.76	0.82	0.8	0.73	0.79	0.92	0.65	0.68	0.65	0.66	0.7	0.62	0.65	0.74	0.7	0.66	0.68	0.57	0.68
21	9	CCNE1, CDK1, E2F8, FOXM1, KIF2C, MSH2, PTTG1, RACGAP1, RRM2	0.77	0.75	0.74	0.67	0.67	0.74	0.84	0.7	0.76	0.77	0.83	0.68	0.68	0.65	0.68	0.64	0.38	0.71	0.76	0.64	0.74	0.59	0.5	0.63
21	9	CDK1, CLOCK, E2F8, FOXM1, KIF2C, MSH2, PTTG1, TOP2A, XPC	0.77	0.62	0.81	0.67	0.7	0.67	0.82	0.7	0.84	0.76	0.75	0.67	0.67	0.65	0.71	0.75	0.92	0.39	0.71	0.7	0.65	0.64	0.61	0.6
21	9	CDK1, E2F8, FOXM1, KIF2C, MSH2, PTTG1, RACGAP1, RRM2, TOP2A	0.77	0.75	0.72	0.68	0.67	0.74	0.83	0.73	0.73	0.76	0.83	0.68	0.69	0.69	0.66	0.67	0.31	0.86	0.74	0.64	0.67	0.6	0.51	0.63
21	10	ASPM, CCNB1, CDK1, FOXM1, LRIG2, MSH2, RACGAP1, RRM2, TMPO, TOP2A	0.77	0.67	0.69	0.68	0.67	0.74	0.83	0.83	0.71	0.78	0.83	0.65	0.68	0.65	0.68	0.68	0.62	0.59	0.74	0.7	0.71	0.69	0.58	0.69
21	10	ASPM, CCNE1, CDK1, E2F8, FOXM1, KIF2C, LRIG2, MSH2, RACGAP1, RRM2	0.78	0.75	0.71	0.67	0.67	0.76	0.83	0.77	0.73	0.77	0.83	0.65	0.69	0.65	0.66	0.74	0.85	0.51	0.67	0.61	0.65	0.6	0.53	0.59
21	10	ASPM, CDK1, E2F8, FOXM1, KIF2C, LRIG2, MSH2, PTTG1, RACGAP1, RRM2	0.77	0.71	0.71	0.68	0.67	0.76	0.83	0.77	0.73	0.77	0.83	0.67	0.7	0.69	0.7	0.67	0.31	0.78	0.74	0.7	0.66	0.6	0.64	0.48

## Sheet: All genes
n	k	Signature	GSE1456, AUC	GSE1456, TPR	GSE1456, TNR	GSE3494, AUC	GSE3494, TPR	GSE3494, TNR	GSE6532, AUC	GSE6532, TPR	GSE6532, TNR	GSE12093, AUC	GSE12093, TPR	GSE12093, TNR	GSE17705, AUC	GSE17705, TPR	GSE17705, TNR	GSE6532, AUC	GSE6532, TPR	GSE6532, TNR	GSE20685, AUC	GSE20685, TPR	GSE20685, TNR	TCGA-BRCA, AUC	TCGA-BRCA, TPR	TCGA-BRCA, TNR
1000	2	C4orf29, KIF4A	0.76	0.75	0.74	0.72	0.67	0.71	0.74	0.67	0.76	0.74	0.75	0.7	0.71	0.65	0.66	0.6	0.77	0.39	0.66	0.52	0.64
1000	2	CCNB2, KIF4A	0.77	0.71	0.75	0.69	0.67	0.71	0.77	0.77	0.67	0.78	0.75	0.7	0.68	0.65	0.69	0.75	0.85	0.45	0.67	0.79	0.58	0.61	0.6	0.55
1000	2	CLTC, KIF4A	0.79	0.79	0.78	0.69	0.67	0.67	0.77	0.77	0.71	0.75	0.67	0.7	0.71	0.65	0.65	0.67	0.69	0.51	0.66	0.61	0.61	0.61	0.59	0.51
1000	2	HDAC6, KIF4A	0.7	0.75	0.67	0.7	0.67	0.67	0.76	0.7	0.69	0.81	0.92	0.68	0.71	0.65	0.65	0.7	0.77	0.69	0.63	0.73	0.51	0.61	0.47	0.66
1000	2	KIF4A, PCDH11Y	0.76	0.71	0.74	0.7	0.67	0.69	0.74	0.67	0.71	0.78	0.83	0.71	0.7	0.65	0.68	0.57	0.69	0.55	0.66	0.73	0.6
1000	2	KIF4A, RAB11FIP3	0.74	0.75	0.68	0.75	0.67	0.67	0.74	0.67	0.76	0.77	0.67	0.67	0.78	0.77	0.72	0.67	0.85	0.35	0.63	0.64	0.54	0.6	0.55	0.55
1000	2	RACGAP1, TP73-AS1	0.75	0.83	0.64	0.75	0.67	0.81	0.8	0.8	0.69	0.71	0.67	0.65	0.7	0.65	0.68	0.26	0.85	0.57	0.34	0.61	0.61	0.62	0.4	0.78
1000	2	RALA, SYNPO	0.65	0.75	0.51	0.73	0.67	0.81	0.78	0.77	0.65	0.74	0.75	0.71	0.74	0.65	0.76	0.69	0.92	0.12	0.71	0.61	0.74	0.51	0.5	0.56
206	3	ACTR3, CX3CR1, LRRC48	0.76	0.79	0.68	0.71	0.7	0.71	0.78	0.7	0.73	0.65	0.67	0.71	0.74	0.73	0.72	0.71	0.69	0.73	0.67	0.67	0.54
206	3	ADIPOR1, CX3CR1, LRRC48	0.76	0.79	0.67	0.72	0.7	0.74	0.79	0.77	0.76	0.65	0.67	0.7	0.75	0.69	0.77	0.73	0.69	0.69	0.68	0.7	0.57
206	3	ADIPOR1, ELOVL5, KIF4A	0.76	0.62	0.71	0.71	0.7	0.67	0.78	0.77	0.67	0.83	0.92	0.71	0.74	0.73	0.73	0.83	0.92	0.51	0.67	0.76	0.55	0.68	0.78	0.57
206	3	ADIPOR1, ENOSF1, KIF4A	0.73	0.83	0.57	0.72	0.67	0.71	0.73	0.73	0.69	0.78	0.75	0.7	0.76	0.69	0.73	0.32	0.85	0.35	0.36	0.79	0.47	0.59	0.65	0.46
206	3	ADIPOR1, KIF4A, TTK	0.75	0.83	0.69	0.71	0.7	0.71	0.78	0.7	0.73	0.81	0.75	0.74	0.75	0.65	0.82	0.7	0.85	0.35	0.62	0.79	0.45	0.58	0.59	0.55
206	3	ALMS1, KIF20A, KIF4A	0.77	0.75	0.74	0.69	0.67	0.69	0.74	0.73	0.65	0.81	0.83	0.71	0.71	0.65	0.68	0.4	1	0	0.32	0.73	0.54	0.64	0.57	0.6
206	3	ALMS1, KIF4A, ZBTB11	0.72	0.58	0.71	0.71	0.67	0.69	0.77	0.73	0.71	0.82	0.92	0.71	0.71	0.69	0.74	0.56	1	0	0.69	0.76	0.56	0.63	0.55	0.6
206	3	ANKRD10-IT1, CX3CR1, LRRC48	0.77	0.75	0.65	0.71	0.7	0.71	0.78	0.7	0.69	0.65	0.67	0.7	0.75	0.73	0.74	0.69	0.92	0.16	0.68	0.79	0.48
206	3	ANKRD10-IT1, ENOSF1, NEK2	0.72	0.88	0.4	0.67	0.73	0.67	0.73	0.67	0.71	0.73	0.75	0.65	0.77	0.77	0.65	0.56	1	0	0.69	0.7	0.58	0.65	0.62	0.64
206	3	ANKRD10-IT1, IFT46, KIF4A	0.79	0.88	0.68	0.71	0.7	0.71	0.8	0.73	0.76	0.73	0.67	0.73	0.7	0.69	0.65	0.65	1	0.04	0.66	0.79	0.53	0.67	0.61	0.61
206	3	APOBEC3B, CDC45, RALA	0.69	0.71	0.64	0.7	0.67	0.69	0.81	0.67	0.84	0.78	0.83	0.7	0.73	0.65	0.8	0.72	0.92	0.06	0.69	0.58	0.68	0.54	0.5	0.56
206	3	APOBEC3B, KIF4A, PLK3	0.77	0.71	0.75	0.7	0.67	0.71	0.75	0.73	0.71	0.79	0.83	0.77	0.73	0.69	0.65	0.77	0.69	0.75	0.63	0.79	0.45	0.66	0.64	0.55
206	3	APOBEC3B, KIF4A, TTK	0.74	0.75	0.69	0.71	0.7	0.74	0.77	0.67	0.82	0.8	0.75	0.73	0.73	0.65	0.71	0.3	0.92	0.31	0.39	0.82	0.45	0.61	0.59	0.56
206	3	AZIN1, IFT46, KIF4A	0.79	0.83	0.68	0.71	0.7	0.74	0.8	0.73	0.78	0.73	0.67	0.73	0.71	0.69	0.66	0.69	0.85	0.49	0.65	0.7	0.44	0.63	0.74	0.47
206	3	BIN3-IT1, FANCI, RAD51AP1	0.74	0.58	0.78	0.7	0.67	0.71	0.8	0.7	0.84	0.74	0.67	0.68	0.7	0.65	0.72	0.73	0.92	0.27	0.68	0.73	0.61
206	3	BIN3-IT1, FANCI, ZWINT	0.75	0.58	0.72	0.71	0.7	0.67	0.81	0.73	0.73	0.76	0.67	0.68	0.69	0.73	0.67	0.76	0.92	0.37	0.67	0.64	0.62
206	3	BUB1B, ELOVL5, KIF4A	0.81	0.54	0.81	0.7	0.7	0.74	0.8	0.67	0.71	0.81	0.83	0.7	0.74	0.65	0.72	0.85	0.92	0.55	0.7	0.76	0.61	0.67	0.78	0.57
206	3	BUB1B, ELOVL5, SQLE	0.8	0.62	0.83	0.71	0.67	0.71	0.84	0.7	0.8	0.73	0.67	0.7	0.74	0.65	0.71	0.82	0.92	0.47	0.73	0.88	0.54	0.65	0.77	0.59
206	3	BUB1B, KIF4A, PPFIA1	0.79	0.71	0.78	0.71	0.7	0.69	0.77	0.7	0.73	0.76	0.75	0.65	0.71	0.65	0.72	0.78	0.69	0.76	0.68	0.67	0.65	0.62	0.57	0.59
206	3	C11orf80, ELOVL5, PBK	0.73	0.38	0.9	0.7	0.7	0.79	0.8	0.87	0.67	0.8	0.75	0.74	0.77	0.65	0.78	0.81	1	0.33	0.69	0.67	0.58	0.72	0.73	0.65
206	3	C11orf80, IFT46, KIF4A	0.79	0.79	0.72	0.72	0.7	0.74	0.81	0.73	0.71	0.72	0.75	0.7	0.72	0.69	0.68	0.73	0.85	0.41	0.63	0.7	0.53	0.65	0.71	0.44
206	3	CACYBP, ENOSF1, NEK2	0.72	0.83	0.47	0.67	0.67	0.69	0.74	0.77	0.65	0.74	0.75	0.65	0.79	0.69	0.73	0.53	0.92	0.1	0.65	0.61	0.63	0.54	0.53	0.55
206	3	CALCOCO1, EGOT, KIF4A	0.73	0.71	0.69	0.74	0.7	0.69	0.79	0.73	0.78	0.76	0.75	0.76	0.71	0.65	0.67	0.71	0.85	0.39	0.7	0.58	0.67
206	3	CCNB1, EGOT, KIF4A	0.74	0.71	0.68	0.74	0.7	0.69	0.78	0.77	0.76	0.77	0.75	0.74	0.71	0.65	0.65	0.72	0.85	0.51	0.68	0.7	0.56
206	3	CCNB2, CX3CR1, ELOVL5	0.79	0.75	0.79	0.73	0.7	0.69	0.8	0.8	0.76	0.73	0.67	0.65	0.73	0.65	0.68	0.78	0.92	0.51	0.7	0.7	0.62	0.63	0.72	0.55
206	3	CCNB2, DLGAP5, KIF4A	0.77	0.75	0.74	0.69	0.67	0.69	0.78	0.77	0.65	0.79	0.83	0.68	0.71	0.73	0.66	0.72	0.85	0.49	0.68	0.7	0.61	0.61	0.6	0.5
206	3	CCNB2, E2F8, KIF4A	0.76	0.75	0.76	0.68	0.7	0.71	0.78	0.73	0.73	0.78	0.83	0.68	0.69	0.65	0.69	0.74	0.85	0.57	0.68	0.64	0.64	0.59	0.56	0.57
206	3	CCNB2, ECT2, KIF4A	0.77	0.71	0.75	0.7	0.67	0.71	0.77	0.73	0.65	0.79	0.75	0.68	0.69	0.65	0.68	0.73	0.85	0.45	0.66	0.73	0.56	0.63	0.66	0.53
206	3	CCNB2, KIF4A, MZT2B	0.77	0.75	0.74	0.69	0.67	0.69	0.77	0.73	0.65	0.79	0.75	0.71	0.69	0.65	0.69	0.57	0.92	0.12	0.7	0.79	0.56	0.61	0.63	0.54
206	3	CCNB2, KIF4A, STMN1	0.77	0.75	0.76	0.7	0.67	0.71	0.78	0.73	0.65	0.79	0.75	0.7	0.68	0.65	0.7	0.65	0.62	0.47	0.7	0.79	0.59	0.63	0.6	0.57
206	3	CCNB2, KIF4A, ZNF767P	0.76	0.79	0.61	0.7	0.67	0.71	0.76	0.73	0.65	0.8	0.83	0.71	0.69	0.65	0.67	0.73	0.85	0.37	0.66	0.79	0.55	0.61	0.61	0.54
206	3	CCT2, FANCI, TTK	0.76	0.75	0.75	0.74	0.67	0.76	0.81	0.7	0.8	0.8	0.83	0.7	0.72	0.65	0.81	0.69	0.85	0.41	0.62	0.67	0.54	0.57	0.42	0.68
206	3	CDC20, CX3CR1, LRRC48	0.77	0.79	0.67	0.72	0.7	0.74	0.79	0.8	0.73	0.67	0.67	0.65	0.75	0.69	0.69	0.74	0.77	0.69	0.69	0.73	0.57
206	3	CDC20, TTK, UBE2C	0.75	0.75	0.69	0.7	0.7	0.74	0.79	0.67	0.88	0.75	0.75	0.71	0.68	0.69	0.69	0.69	0.85	0.51	0.63	0.67	0.54	0.61	0.68	0.5
206	3	CDC45, CEP55, TTK	0.76	0.71	0.71	0.69	0.67	0.67	0.8	0.7	0.88	0.77	0.83	0.71	0.72	0.65	0.75	0.68	0.77	0.37	0.64	0.64	0.59	0.6	0.55	0.7
206	3	CDC45, CLUHP3, RALA	0.69	0.54	0.67	0.72	0.67	0.69	0.82	0.67	0.9	0.78	0.75	0.7	0.74	0.65	0.77	0.73	0.92	0.25	0.68	0.45	0.74	0.51	0.39	0.61
206	3	CDC45, EGOT, NKRF	0.71	0.54	0.76	0.75	0.7	0.71	0.82	0.7	0.73	0.77	0.67	0.77	0.7	0.65	0.65	0.67	0.69	0.65	0.65	0.61	0.57
206	3	CDC45, ELOVL5, PBK	0.76	0.42	0.89	0.69	0.7	0.79	0.81	0.73	0.78	0.81	0.67	0.73	0.73	0.69	0.67	0.8	1	0.41	0.68	0.67	0.56	0.68	0.77	0.54
206	3	CDC45, ELOVL5, ZNF767P	0.7	0.62	0.67	0.7	0.67	0.69	0.8	0.67	0.78	0.79	0.67	0.76	0.68	0.65	0.68	0.81	1	0.37	0.66	0.7	0.48	0.62	0.68	0.53
206	3	CDC45, ELP4, SQLE	0.77	0.62	0.81	0.71	0.67	0.67	0.84	0.73	0.82	0.69	0.67	0.73	0.71	0.69	0.68	0.26	0.85	0.47	0.3	0.79	0.55	0.57	0.57	0.56
206	3	CDC45, ENOSF1, PPFIA1	0.77	0.71	0.67	0.71	0.67	0.69	0.8	0.73	0.8	0.71	0.67	0.7	0.72	0.65	0.67	0.7	0.38	0.84	0.68	0.52	0.72	0.54	0.54	0.51
206	3	CDC45, FLJ42627, RALA	0.69	0.54	0.67	0.71	0.67	0.69	0.81	0.67	0.92	0.77	0.75	0.67	0.73	0.65	0.72	0.69	0.92	0.06	0.69	0.64	0.67
206	3	CDC45, HEBP2, SNHG17	0.71	0.42	0.86	0.76	0.67	0.71	0.79	0.73	0.76	0.69	0.67	0.71	0.7	0.65	0.68	0.34	0.38	0.86	0.43	0.33	0.69	0.52	0.57	0.49
206	3	CDC45, LRRC48, RALA	0.69	0.67	0.58	0.72	0.73	0.67	0.83	0.67	0.84	0.75	0.83	0.68	0.76	0.69	0.68	0.75	0.85	0.39	0.72	0.76	0.61
206	3	CDK1, EGOT, KIF4A	0.73	0.71	0.69	0.73	0.67	0.69	0.79	0.73	0.76	0.77	0.75	0.74	0.7	0.69	0.65	0.25	0.85	0.47	0.34	0.82	0.52
206	3	CDKN3, EGOT, SQLE	0.76	0.71	0.65	0.74	0.73	0.71	0.84	0.77	0.71	0.74	0.67	0.71	0.73	0.65	0.68	0.73	0.85	0.49	0.72	0.76	0.64
206	3	CDS1, ENOSF1, NEK2	0.71	0.88	0.43	0.66	0.67	0.67	0.75	0.73	0.67	0.76	0.83	0.68	0.78	0.69	0.81	0.33	0.92	0.35	0.35	0.73	0.46	0.57	0.6	0.47
206	3	CENPQ, CX3CR1, TTK	0.76	0.75	0.75	0.73	0.7	0.74	0.79	0.67	0.82	0.72	0.67	0.67	0.76	0.69	0.78	0.31	0.77	0.51	0.38	0.67	0.52	0.58	0.58	0.55
206	3	CKAP5, EGOT, KIF4A	0.74	0.71	0.68	0.74	0.79	0.67	0.78	0.73	0.78	0.77	0.75	0.77	0.7	0.65	0.68	0.74	0.69	0.65	0.67	0.73	0.58
206	3	CLUHP3, COQ3, KIF4A	0.74	0.67	0.75	0.71	0.67	0.74	0.76	0.73	0.71	0.83	0.75	0.73	0.74	0.65	0.69	0.21	0.92	0.41	0.37	0.7	0.56	0.59	0.49	0.61
206	3	CLUHP3, IFT46, KIF4A	0.76	0.83	0.67	0.7	0.7	0.67	0.81	0.77	0.78	0.74	0.75	0.73	0.74	0.65	0.67	0.78	0.77	0.69	0.62	0.76	0.55	0.64	0.74	0.46
206	3	CLUHP3, KIF4A, TTK	0.74	0.79	0.69	0.7	0.73	0.71	0.79	0.73	0.8	0.82	0.67	0.73	0.75	0.65	0.74	0.74	0.85	0.31	0.62	0.82	0.44	0.6	0.56	0.56
206	3	CMC2, CX3CR1, LRRC48	0.77	0.71	0.76	0.73	0.73	0.79	0.79	0.73	0.67	0.66	0.67	0.65	0.73	0.69	0.74	0.28	0.62	0.75	0.3	0.39	0.82
206	3	CNIH4, KIF4A, TRIM66	0.78	0.75	0.71	0.71	0.67	0.69	0.76	0.73	0.67	0.79	0.92	0.68	0.75	0.73	0.65	0.64	0.85	0.31	0.64	0.61	0.55	0.58	0.53	0.59
206	3	CNIH4, SQLE, TTK	0.75	0.71	0.64	0.72	0.67	0.74	0.82	0.7	0.84	0.75	0.67	0.67	0.75	0.73	0.71	0.67	0.92	0.29	0.71	0.79	0.56	0.58	0.51	0.62
206	3	COPB2, FANCI, NKRF	0.73	0.38	0.85	0.74	0.67	0.76	0.8	0.77	0.71	0.75	0.75	0.67	0.76	0.73	0.7	0.68	0.92	0.25	0.66	0.7	0.52	0.49	0.37	0.63
206	3	COPB2, FOXD1, KIF4A	0.77	0.58	0.79	0.71	0.67	0.76	0.8	0.7	0.8	0.8	0.67	0.74	0.72	0.69	0.69	0.75	0.85	0.49	0.62	0.73	0.47
206	3	COPB2, KIF4A, STMN1	0.75	0.71	0.72	0.71	0.67	0.71	0.74	0.73	0.65	0.78	0.75	0.68	0.75	0.65	0.67	0.22	0.85	0.35	0.39	0.7	0.45	0.62	0.6	0.57
206	3	COQ3, CX3CR1, LRRC48	0.77	0.79	0.67	0.73	0.67	0.79	0.78	0.73	0.69	0.68	0.67	0.73	0.75	0.77	0.71	0.72	0.77	0.67	0.67	0.7	0.56
206	3	COQ3, FANCI, GRAMD4	0.74	0.38	0.86	0.71	0.67	0.76	0.77	0.67	0.71	0.77	0.75	0.65	0.7	0.73	0.67	0.67	0.69	0.61	0.66	0.73	0.55	0.51	0.38	0.64
206	3	COQ3, FANCI, TCF7	0.72	0.46	0.79	0.72	0.67	0.71	0.78	0.73	0.73	0.75	0.75	0.65	0.71	0.69	0.67	0.55	0.92	0.12	0.68	0.7	0.58	0.67	0.72	0.56
206	3	COQ3, FANCI, TGS1	0.67	0.42	0.85	0.69	0.67	0.76	0.83	0.73	0.8	0.77	0.67	0.67	0.71	0.73	0.7	0.36	0.92	0.39	0.35	0.67	0.51	0.57	0.49	0.6
206	3	COQ3, HEBP2, KIF4A	0.73	0.62	0.76	0.74	0.67	0.79	0.76	0.7	0.65	0.82	0.75	0.77	0.74	0.65	0.7	0.26	0.85	0.57	0.37	0.76	0.5	0.59	0.53	0.6
206	3	CX3CR1, DTL, LRRC48	0.77	0.75	0.72	0.72	0.7	0.76	0.8	0.83	0.73	0.66	0.67	0.65	0.75	0.69	0.7	0.75	0.77	0.59	0.69	0.82	0.48
206	3	CX3CR1, ECT2, LRRC48	0.77	0.79	0.68	0.72	0.7	0.74	0.77	0.7	0.71	0.65	0.67	0.7	0.75	0.77	0.69	0.74	0.77	0.65	0.67	0.73	0.54
206	3	CX3CR1, EGOT, KIF4A	0.76	0.71	0.75	0.76	0.67	0.76	0.79	0.7	0.78	0.73	0.67	0.71	0.75	0.69	0.68	0.73	0.62	0.75	0.67	0.76	0.59
206	3	CX3CR1, EGOT, SQLE	0.77	0.71	0.75	0.76	0.7	0.69	0.81	0.7	0.82	0.68	0.67	0.65	0.72	0.69	0.65	0.75	0.77	0.51	0.72	0.85	0.55
206	3	CX3CR1, ELOVL5, PBK	0.79	0.5	0.85	0.72	0.67	0.76	0.82	0.8	0.73	0.7	0.67	0.67	0.77	0.65	0.74	0.8	0.92	0.43	0.66	0.76	0.53	0.67	0.75	0.57
206	3	CX3CR1, ELOVL5, PRC1	0.8	0.71	0.83	0.73	0.73	0.69	0.81	0.73	0.76	0.74	0.75	0.67	0.75	0.69	0.72	0.83	0.92	0.61	0.68	0.73	0.59	0.65	0.73	0.58
206	3	CX3CR1, EPRS, LRRC48	0.78	0.88	0.68	0.72	0.7	0.74	0.8	0.77	0.71	0.65	0.67	0.7	0.77	0.73	0.73	0.76	0.77	0.71	0.67	0.73	0.56
206	3	CX3CR1, FBXO34, LRRC48	0.77	0.79	0.67	0.71	0.7	0.71	0.78	0.73	0.67	0.66	0.67	0.67	0.76	0.73	0.69	0.74	0.69	0.78	0.67	0.67	0.54
206	3	CX3CR1, FOXD1, LRRC48	0.79	0.75	0.65	0.71	0.7	0.74	0.79	0.73	0.71	0.65	0.67	0.7	0.74	0.77	0.68	0.75	0.77	0.71	0.67	0.76	0.51
206	3	CX3CR1, HDAC2, LRRC48	0.75	0.79	0.62	0.74	0.73	0.71	0.8	0.77	0.69	0.66	0.67	0.67	0.76	0.65	0.78	0.73	0.69	0.71	0.67	0.73	0.53
206	3	CX3CR1, KIF18A, LRRC48	0.79	0.79	0.72	0.72	0.67	0.79	0.81	0.73	0.73	0.65	0.67	0.68	0.75	0.81	0.69	0.73	0.77	0.75	0.69	0.73	0.62
206	3	CX3CR1, KIF2C, LRRC48	0.77	0.75	0.68	0.72	0.7	0.76	0.78	0.7	0.78	0.66	0.67	0.67	0.74	0.73	0.68	0.73	0.77	0.67	0.69	0.79	0.5
206	3	CX3CR1, LMNB1, LRRC48	0.76	0.75	0.71	0.71	0.73	0.69	0.79	0.7	0.78	0.66	0.67	0.68	0.73	0.77	0.68	0.73	0.77	0.73	0.68	0.76	0.53
206	3	CX3CR1, LRRC48, MIR6758	0.78	0.75	0.75	0.71	0.67	0.69	0.78	0.7	0.78	0.65	0.67	0.68	0.76	0.69	0.74	0.73	0.69	0.71	0.68	0.73	0.6
206	3	CX3CR1, LRRC48, MOSPD1	0.76	0.75	0.68	0.71	0.7	0.71	0.78	0.7	0.71	0.65	0.67	0.7	0.74	0.73	0.67	0.73	0.77	0.71	0.67	0.73	0.53
206	3	CX3CR1, LRRC48, MTFR1	0.76	0.75	0.69	0.72	0.7	0.69	0.78	0.7	0.73	0.65	0.67	0.67	0.74	0.73	0.67	0.7	0.77	0.69	0.67	0.73	0.53
206	3	CX3CR1, LRRC48, MZT2B	0.76	0.79	0.62	0.71	0.7	0.71	0.78	0.7	0.71	0.65	0.67	0.68	0.75	0.73	0.71	0.69	0.85	0.43	0.67	0.7	0.55
206	3	CX3CR1, LRRC48, PARL	0.76	0.75	0.69	0.73	0.67	0.71	0.77	0.7	0.71	0.65	0.67	0.68	0.77	0.69	0.81	0.75	0.77	0.65	0.67	0.67	0.6
206	3	CX3CR1, LRRC48, RALA	0.75	0.75	0.67	0.72	0.7	0.76	0.81	0.67	0.78	0.67	0.67	0.68	0.77	0.65	0.73	0.74	0.85	0.47	0.71	0.73	0.55
206	3	CX3CR1, LRRC48, SPC25	0.78	0.71	0.74	0.72	0.67	0.76	0.81	0.77	0.8	0.67	0.67	0.7	0.74	0.69	0.68	0.72	0.77	0.67	0.68	0.64	0.61
206	3	CX3CR1, LRRC48, STAM	0.77	0.75	0.67	0.71	0.7	0.71	0.78	0.7	0.71	0.66	0.67	0.68	0.74	0.69	0.69	0.75	0.77	0.69	0.67	0.76	0.55
206	3	CX3CR1, LRRC48, TOP2A	0.78	0.79	0.71	0.71	0.7	0.76	0.79	0.7	0.76	0.66	0.67	0.68	0.74	0.73	0.7	0.72	0.77	0.65	0.71	0.76	0.61
206	3	CX3CR1, LRRC48, ZBTB40	0.77	0.83	0.6	0.73	0.67	0.71	0.77	0.7	0.73	0.65	0.67	0.73	0.76	0.73	0.79	0.64	0.46	0.75	0.72	0.55	0.77
206	3	CX3CR1, LRRC48, ZNF623	0.74	0.75	0.62	0.72	0.67	0.76	0.81	0.73	0.76	0.68	0.67	0.68	0.73	0.65	0.68	0.76	0.77	0.63	0.69	0.7	0.58
206	3	DAAM1, ENOSF1, NEK2	0.73	0.83	0.5	0.67	0.67	0.69	0.73	0.67	0.71	0.75	0.75	0.68	0.78	0.65	0.77	0.58	0.46	0.51	0.65	0.61	0.58	0.52	0.43	0.57
206	3	DAAM1, KIF4A, RALA	0.71	0.75	0.6	0.75	0.67	0.74	0.78	0.7	0.8	0.81	0.92	0.65	0.75	0.65	0.68	0.71	0.92	0.25	0.73	0.61	0.72	0.57	0.58	0.5
206	3	DAAM1, KIF4A, TTK	0.74	0.79	0.69	0.7	0.67	0.74	0.77	0.67	0.82	0.8	0.75	0.73	0.72	0.65	0.72	0.67	0.85	0.39	0.63	0.73	0.5	0.58	0.6	0.53
206	3	DBNDD1, ECHDC2, ELOVL5	0.76	0.88	0.42	0.73	0.67	0.81	0.75	0.7	0.69	0.77	0.67	0.77	0.7	0.69	0.65	0.83	1	0.53	0.67	0.7	0.64	0.63	0.6	0.65
206	3	DBNDD1, ELOVL5, ZWINT	0.75	0.58	0.76	0.72	0.67	0.76	0.8	0.8	0.76	0.83	0.75	0.71	0.7	0.65	0.73	0.85	0.92	0.57	0.66	0.61	0.61	0.64	0.71	0.58
206	3	DBNDD1, ENOSF1, ZWINT	0.74	0.79	0.54	0.73	0.67	0.69	0.78	0.87	0.65	0.79	0.83	0.71	0.7	0.69	0.69	0.22	0.77	0.69	0.39	0.52	0.69	0.57	0.47	0.62
206	3	DBNDD1, KIF4A, NUSAP1	0.77	0.75	0.67	0.73	0.7	0.69	0.78	0.8	0.65	0.8	0.83	0.65	0.7	0.69	0.66	0.79	0.85	0.49	0.65	0.58	0.64	0.65	0.63	0.6
206	3	DBNDD1, KIF4A, RALA	0.75	0.75	0.57	0.77	0.76	0.74	0.81	0.73	0.76	0.84	0.83	0.73	0.75	0.65	0.73	0.77	0.92	0.16	0.7	0.7	0.66	0.61	0.62	0.55
206	3	DBNDD1, KIF4A, TRIM66	0.77	0.79	0.74	0.73	0.67	0.71	0.77	0.7	0.65	0.79	0.67	0.68	0.72	0.69	0.68	0.7	0.77	0.47	0.65	0.58	0.67	0.61	0.55	0.6
206	3	DIP2A, KIF20A, KIF4A	0.77	0.75	0.74	0.69	0.67	0.69	0.74	0.73	0.67	0.79	0.75	0.68	0.71	0.65	0.65	0.63	1	0	0.65	0.61	0.66	0.62	0.61	0.55
206	3	DIP2A, KIF4A, PLK3	0.76	0.71	0.74	0.7	0.67	0.71	0.73	0.7	0.71	0.75	0.67	0.76	0.74	0.69	0.71	0.67	1	0	0.67	0.7	0.52	0.65	0.63	0.56
206	3	ECHDC2, EGOT, KIAA0101	0.71	0.79	0.51	0.74	0.7	0.69	0.77	0.77	0.67	0.74	0.67	0.71	0.72	0.65	0.75	0.7	0.85	0.55	0.68	0.7	0.59
206	3	ECHDC2, EGOT, KIF4A	0.72	0.79	0.6	0.75	0.67	0.69	0.78	0.73	0.82	0.77	0.67	0.77	0.72	0.69	0.69	0.74	0.85	0.47	0.67	0.73	0.56
206	3	ECHDC2, KIF2C, LRRC48	0.72	0.92	0.39	0.7	0.67	0.69	0.78	0.73	0.69	0.71	0.67	0.77	0.75	0.65	0.71	0.74	0.77	0.59	0.7	0.73	0.56
206	3	ECHDC2, PPAT, STARD13	0.74	0.83	0.43	0.73	0.67	0.71	0.77	0.77	0.71	0.69	0.67	0.68	0.7	0.65	0.66	0.74	0.92	0.41	0.66	0.7	0.57	0.63	0.59	0.54
206	3	ECT2, KIF4A, PLK3	0.76	0.71	0.75	0.71	0.67	0.71	0.74	0.73	0.69	0.78	0.75	0.76	0.74	0.73	0.65	0.23	0.62	0.78	0.36	0.73	0.42	0.67	0.62	0.61
206	3	EGOT, EPRS, SQLE	0.75	0.79	0.62	0.75	0.7	0.71	0.82	0.8	0.8	0.71	0.67	0.76	0.74	0.69	0.75	0.73	0.92	0.51	0.71	0.79	0.63
206	3	EGOT, FOXD1, KIF4A	0.77	0.75	0.71	0.75	0.76	0.67	0.81	0.8	0.8	0.77	0.67	0.76	0.7	0.65	0.65	0.71	0.69	0.61	0.67	0.76	0.58
206	3	EGOT, GOLT1B, SQLE	0.74	0.67	0.67	0.73	0.73	0.71	0.82	0.73	0.82	0.78	0.67	0.76	0.73	0.65	0.74	0.69	0.92	0.43	0.72	0.79	0.62
206	3	EGOT, HCCS, KIF4A	0.74	0.71	0.69	0.74	0.73	0.69	0.78	0.7	0.78	0.77	0.67	0.76	0.71	0.69	0.66	0.7	0.54	0.73	0.68	0.7	0.59
206	3	EGOT, HEBP2, KIF4A	0.69	0.71	0.67	0.75	0.73	0.71	0.79	0.73	0.78	0.77	0.67	0.76	0.75	0.65	0.77	0.27	0.69	0.55	0.34	0.82	0.48
206	3	EGOT, KIAA0101, KIF4A	0.73	0.71	0.69	0.74	0.73	0.67	0.78	0.73	0.78	0.77	0.75	0.76	0.71	0.65	0.65	0.29	0.85	0.45	0.35	0.82	0.46
206	3	EGOT, KIF4A, MIR6758	0.74	0.71	0.68	0.74	0.73	0.69	0.78	0.7	0.78	0.77	0.67	0.76	0.72	0.69	0.67	0.7	0.77	0.37	0.67	0.79	0.48
206	3	EGOT, KIF4A, MTFR1	0.73	0.71	0.65	0.74	0.76	0.69	0.79	0.73	0.78	0.77	0.75	0.76	0.71	0.65	0.65	0.38	0	0.98	0.34	0	1
206	3	EGOT, KIF4A, NKRF	0.72	0.71	0.74	0.75	0.7	0.74	0.79	0.77	0.78	0.78	0.83	0.77	0.74	0.69	0.66	0.71	0.62	0.61	0.67	0.55	0.58
206	3	EGOT, KIF4A, ZBTB40	0.73	0.71	0.69	0.74	0.73	0.69	0.77	0.67	0.78	0.77	0.67	0.77	0.71	0.65	0.66	0.6	0.54	0.67	0.72	0.7	0.65
206	3	EGOT, KIF4A, ZNF767P	0.73	0.79	0.62	0.74	0.73	0.67	0.77	0.77	0.78	0.77	0.67	0.76	0.71	0.65	0.65	0.72	0.77	0.65	0.66	0.7	0.58
206	3	EGOT, NDUFA6, SQLE	0.74	0.67	0.69	0.75	0.7	0.79	0.83	0.7	0.78	0.73	0.67	0.76	0.73	0.65	0.78	0.73	0.92	0.51	0.71	0.82	0.58
206	3	EGOT, SPC25, SQLE	0.75	0.71	0.67	0.74	0.76	0.69	0.84	0.7	0.82	0.78	0.67	0.76	0.72	0.77	0.69	0.73	0.77	0.45	0.72	0.79	0.61
206	3	ELOVL5, ENOSF1, ZWINT	0.72	0.62	0.71	0.7	0.67	0.67	0.81	0.83	0.69	0.84	0.67	0.73	0.74	0.65	0.73	0.84	1	0.57	0.67	0.73	0.59	0.62	0.69	0.54
206	3	ELOVL5, FOXD1, PBK	0.73	0.38	0.9	0.69	0.67	0.71	0.8	0.8	0.67	0.83	0.75	0.76	0.76	0.65	0.74	0.2	0.92	0.47	0.33	0.61	0.61
206	3	ELOVL5, KIF2C, ZWINT	0.72	0.5	0.79	0.69	0.67	0.71	0.8	0.77	0.69	0.84	0.75	0.73	0.71	0.65	0.72	0.83	0.92	0.53	0.67	0.67	0.59	0.63	0.78	0.47
206	3	ELOVL5, KIF4A, PBK	0.77	0.42	0.85	0.7	0.7	0.71	0.79	0.83	0.65	0.84	0.83	0.73	0.77	0.69	0.69	0.82	0.92	0.43	0.67	0.76	0.5	0.69	0.81	0.52
206	3	ELOVL5, KIF4A, PLK3	0.76	0.54	0.82	0.7	0.7	0.67	0.77	0.67	0.67	0.81	0.83	0.74	0.75	0.65	0.67	0.83	0.92	0.65	0.66	0.67	0.59	0.7	0.66	0.65
206	3	ELOVL5, KIF4A, PRC1	0.78	0.54	0.83	0.7	0.67	0.74	0.81	0.7	0.76	0.83	0.83	0.74	0.74	0.65	0.73	0.83	0.92	0.53	0.68	0.67	0.57	0.67	0.78	0.57
206	3	ELOVL5, LRRC48, PRC1	0.77	0.62	0.75	0.7	0.67	0.67	0.84	0.77	0.73	0.81	0.83	0.74	0.76	0.65	0.75	0.85	0.92	0.51	0.71	0.82	0.57
206	3	ELOVL5, MOSPD1, PBK	0.7	0.33	0.93	0.7	0.7	0.74	0.8	0.73	0.69	0.82	0.75	0.73	0.77	0.65	0.78	0.79	1	0.2	0.69	0.85	0.5	0.69	0.77	0.6
206	3	ELOVL5, NEK2, PBK	0.75	0.5	0.79	0.69	0.67	0.69	0.79	0.8	0.65	0.82	0.75	0.68	0.77	0.69	0.78	0.79	0.92	0.45	0.67	0.64	0.58	0.69	0.76	0.58
206	3	ELOVL5, NEK2, SQLE	0.78	0.67	0.79	0.7	0.67	0.69	0.8	0.7	0.71	0.75	0.67	0.68	0.74	0.73	0.67	0.8	0.92	0.41	0.72	0.91	0.49	0.64	0.72	0.54
206	3	ELOVL5, NEK2, ZWINT	0.75	0.58	0.78	0.69	0.67	0.71	0.8	0.8	0.69	0.84	0.92	0.68	0.73	0.65	0.72	0.83	0.92	0.49	0.66	0.67	0.55	0.63	0.81	0.41
206	3	ELOVL5, NUSAP1, PBK	0.77	0.42	0.81	0.69	0.7	0.71	0.81	0.8	0.69	0.85	0.92	0.7	0.77	0.65	0.83	0.82	0.92	0.43	0.68	0.7	0.56	0.68	0.79	0.54
206	3	ELOVL5, NUSAP1, RRM2	0.77	0.62	0.75	0.71	0.67	0.74	0.79	0.77	0.65	0.83	0.92	0.65	0.73	0.69	0.74	0.83	0.92	0.45	0.68	0.76	0.53	0.64	0.83	0.47
206	3	ELOVL5, PBK, SPC25	0.76	0.46	0.82	0.68	0.7	0.69	0.83	0.8	0.78	0.85	0.75	0.74	0.74	0.65	0.71	0.79	0.92	0.47	0.67	0.55	0.66	0.68	0.79	0.54
206	3	ELOVL5, PBK, STARD13	0.75	0.58	0.76	0.71	0.67	0.71	0.81	0.87	0.65	0.77	0.75	0.7	0.77	0.77	0.69	0.8	1	0.41	0.67	0.82	0.49	0.7	0.75	0.59
206	3	ELOVL5, PBK, ZWINT	0.73	0.46	0.83	0.69	0.67	0.74	0.82	0.83	0.71	0.83	0.75	0.73	0.75	0.69	0.75	0.18	1	0.41	0.33	0.73	0.52	0.68	0.74	0.59
206	3	ELOVL5, PRC1, STARD13	0.79	0.71	0.76	0.71	0.73	0.67	0.82	0.8	0.76	0.79	0.83	0.71	0.72	0.65	0.67	0.81	0.92	0.49	0.69	0.7	0.55	0.66	0.68	0.6
206	3	ELOVL5, STARD13, TTK	0.75	0.79	0.62	0.72	0.67	0.67	0.83	0.7	0.82	0.8	0.67	0.77	0.72	0.65	0.69	0.2	0.92	0.59	0.36	0.73	0.54	0.66	0.72	0.56
206	3	ELP4, ENOSF1, KIF4A	0.75	0.67	0.64	0.71	0.67	0.71	0.77	0.7	0.69	0.78	0.67	0.77	0.74	0.65	0.72	0.32	0.92	0.39	0.37	0.76	0.44	0.58	0.57	0.51
206	3	ENOSF1, GMFB, KIF4A	0.73	0.71	0.64	0.73	0.76	0.67	0.76	0.67	0.67	0.78	0.83	0.65	0.76	0.69	0.7	0.32	0.62	0.59	0.36	0.73	0.5	0.59	0.56	0.52
206	3	ENOSF1, KIF4A, NUSAP1	0.76	0.88	0.61	0.7	0.7	0.69	0.77	0.73	0.67	0.8	0.92	0.68	0.74	0.73	0.67	0.74	0.92	0.53	0.66	0.67	0.58	0.64	0.64	0.56
206	3	ENOSF1, KIF4A, PARL	0.74	0.67	0.62	0.71	0.7	0.71	0.74	0.7	0.67	0.8	0.83	0.74	0.75	0.65	0.68	0.25	0.92	0.49	0.36	0.58	0.58	0.62	0.62	0.49
206	3	ENOSF1, KIF4A, SUCO	0.73	0.79	0.6	0.71	0.7	0.71	0.76	0.73	0.67	0.78	0.83	0.68	0.78	0.73	0.74	0.32	0.85	0.35	0.38	0.82	0.42	0.58	0.61	0.47
206	3	ENOSF1, KIF4A, TSFM	0.76	0.75	0.68	0.72	0.67	0.69	0.75	0.67	0.76	0.75	0.67	0.71	0.75	0.65	0.72	0.35	0.92	0.18	0.34	0.79	0.44	0.57	0.6	0.46
206	3	ENOSF1, KIF4A, TTK	0.75	0.79	0.6	0.71	0.7	0.71	0.79	0.67	0.78	0.79	0.75	0.77	0.75	0.65	0.7	0.71	0.85	0.45	0.62	0.67	0.5	0.6	0.58	0.56
206	3	ENOSF1, KIF4A, ZWILCH	0.74	0.79	0.61	0.71	0.67	0.69	0.75	0.73	0.73	0.8	0.83	0.73	0.75	0.69	0.65	0.54	0.85	0.31	0.69	0.73	0.62	0.68	0.65	0.62
206	3	ENOSF1, MED1, SQLE	0.73	0.88	0.51	0.7	0.67	0.71	0.79	0.67	0.78	0.67	0.67	0.67	0.72	0.65	0.72	0.7	0.77	0.41	0.71	0.76	0.56	0.57	0.46	0.66
206	3	ENOSF1, NEK2, TCEB3-AS1	0.74	0.92	0.46	0.68	0.73	0.67	0.73	0.73	0.65	0.75	0.75	0.65	0.78	0.69	0.81	0.67	0.77	0.53	0.64	0.67	0.52
206	3	EPN3, KIF4A, MOSPD1	0.77	0.5	0.85	0.74	0.67	0.79	0.81	0.7	0.86	0.81	0.83	0.76	0.68	0.65	0.76	0.78	1	0.18	0.69	0.73	0.64	0.65	0.57	0.62
206	3	EPRS, SQLE, TTK	0.75	0.75	0.6	0.72	0.67	0.69	0.82	0.73	0.8	0.74	0.67	0.7	0.77	0.73	0.72	0.72	1	0.39	0.71	0.79	0.56	0.57	0.52	0.62
206	3	FANCI, GRAMD4, LRRC48	0.72	0.58	0.76	0.71	0.67	0.67	0.8	0.67	0.76	0.75	0.75	0.7	0.74	0.65	0.66	0.74	0.77	0.65	0.7	0.79	0.54
206	3	FANCI, NKRF, SMC4	0.73	0.38	0.85	0.72	0.67	0.71	0.81	0.8	0.76	0.77	0.75	0.67	0.74	0.73	0.65	0.73	0.92	0.39	0.66	0.67	0.6	0.48	0.38	0.63
206	3	FBXO5, SNHG17, SQLE	0.74	0.54	0.75	0.73	0.7	0.67	0.83	0.7	0.8	0.7	0.67	0.73	0.69	0.65	0.68	0.69	0.92	0.37	0.72	0.76	0.58	0.56	0.52	0.59
206	3	GGCT, SQLE, TTK	0.73	0.62	0.71	0.71	0.67	0.71	0.82	0.67	0.86	0.74	0.67	0.76	0.76	0.69	0.79	0.72	0.85	0.43	0.71	0.79	0.57	0.6	0.48	0.69
206	3	GRAMD4, KIF4A, MTFR1	0.74	0.71	0.72	0.71	0.67	0.69	0.77	0.7	0.69	0.8	0.83	0.71	0.75	0.69	0.69	0.59	0.62	0.45	0.65	0.76	0.59	0.61	0.55	0.61
206	3	GRAMD4, KIF4A, STAG3L3	0.75	0.75	0.68	0.7	0.67	0.69	0.74	0.7	0.71	0.77	0.67	0.77	0.75	0.65	0.67	0.37	1	0.12	0.33	0.76	0.55
206	3	HDAC2, LRRC48, SQLE	0.68	0.83	0.49	0.72	0.7	0.71	0.83	0.77	0.84	0.75	0.75	0.74	0.73	0.65	0.81	0.74	0.85	0.55	0.73	0.85	0.58
206	3	HEBP2, KIF4A, RALA	0.71	0.75	0.67	0.76	0.73	0.74	0.78	0.73	0.73	0.83	0.83	0.67	0.78	0.65	0.75	0.76	0.92	0.24	0.7	0.61	0.66	0.58	0.57	0.56
206	3	HEBP2, PPFIA1, SQLE	0.68	0.58	0.76	0.72	0.67	0.71	0.81	0.73	0.76	0.66	0.67	0.67	0.74	0.65	0.76	0.75	0.69	0.67	0.72	0.7	0.64	0.59	0.52	0.62
206	3	IFT46, KIF14, KIF4A	0.8	0.88	0.68	0.71	0.67	0.76	0.8	0.73	0.71	0.72	0.75	0.71	0.7	0.65	0.65	0.76	0.85	0.61	0.64	0.73	0.52	0.7	0.66	0.63
206	3	IFT46, KIF4A, LRRC48	0.77	0.88	0.62	0.7	0.67	0.69	0.82	0.73	0.78	0.71	0.67	0.79	0.72	0.73	0.68	0.77	0.77	0.57	0.68	0.85	0.44
206	3	IFT46, KIF4A, MTFR1	0.77	0.83	0.67	0.71	0.67	0.76	0.81	0.73	0.8	0.72	0.67	0.73	0.71	0.65	0.67	0.62	0.69	0.51	0.64	0.73	0.49	0.64	0.7	0.56
206	3	IFT46, KIF4A, NEK2	0.79	0.83	0.68	0.71	0.7	0.71	0.79	0.73	0.8	0.73	0.75	0.71	0.71	0.65	0.68	0.26	0.85	0.55	0.37	0.76	0.45	0.64	0.71	0.52
206	3	IFT46, KIF4A, PFDN2	0.8	0.83	0.68	0.73	0.7	0.74	0.8	0.73	0.71	0.73	0.67	0.7	0.74	0.73	0.69	0.28	0.77	0.51	0.37	0.7	0.54	0.63	0.69	0.51
206	3	IFT46, KIF4A, RALA	0.76	0.88	0.58	0.74	0.82	0.74	0.81	0.7	0.73	0.76	0.83	0.65	0.76	0.69	0.73	0.76	0.92	0.2	0.7	0.64	0.66	0.64	0.67	0.55
206	3	IFT46, KIF4A, RNF139	0.79	0.79	0.68	0.72	0.7	0.76	0.8	0.73	0.78	0.73	0.67	0.73	0.72	0.69	0.68	0.68	0.92	0.27	0.65	0.85	0.48	0.64	0.65	0.59
206	3	IFT46, KIF4A, TBCE	0.79	0.75	0.69	0.71	0.7	0.71	0.8	0.73	0.73	0.72	0.67	0.71	0.71	0.65	0.65	0.31	0.85	0.45	0.36	0.82	0.46
206	3	IFT46, KIF4A, TIMM17A	0.79	0.83	0.69	0.72	0.67	0.76	0.8	0.73	0.71	0.73	0.67	0.73	0.72	0.69	0.66	0.72	0.92	0.35	0.65	0.76	0.52	0.63	0.66	0.55
206	3	IFT46, KIF4A, VILL	0.8	0.88	0.67	0.72	0.7	0.71	0.79	0.73	0.73	0.72	0.67	0.71	0.7	0.73	0.65	0.28	0.77	0.63	0.32	0.85	0.55	0.64	0.7	0.52
206	3	KIAA0101, KIF4A, RALA	0.72	0.75	0.61	0.74	0.67	0.71	0.78	0.7	0.8	0.83	0.83	0.67	0.75	0.65	0.73	0.73	0.92	0.16	0.7	0.73	0.6
206	3	KIAA0101, SQLE, TTK	0.76	0.67	0.68	0.72	0.7	0.71	0.82	0.7	0.82	0.76	0.67	0.7	0.74	0.65	0.72	0.71	0.92	0.41	0.71	0.79	0.55
206	3	KIF18A, SNHG17, SQLE	0.78	0.58	0.78	0.74	0.67	0.71	0.85	0.7	0.84	0.66	0.67	0.7	0.68	0.65	0.68	0.69	0.92	0.43	0.72	0.76	0.61	0.55	0.48	0.62
206	3	KIF18A, SQLE, TIPIN	0.77	0.67	0.75	0.71	0.67	0.69	0.85	0.7	0.84	0.68	0.67	0.7	0.7	0.65	0.68	0.66	0.92	0.16	0.75	0.79	0.64	0.56	0.43	0.65
206	3	KIF20A, KIF4A, ME3	0.76	0.79	0.69	0.72	0.67	0.79	0.76	0.7	0.69	0.77	0.75	0.71	0.72	0.77	0.7	0.27	0.92	0.43	0.37	0.7	0.51	0.6	0.6	0.54
206	3	KIF4A, LACTB2, PLK3	0.76	0.71	0.76	0.71	0.67	0.71	0.74	0.7	0.69	0.78	0.67	0.76	0.74	0.69	0.65	0.33	0.92	0.39	0.34	0.79	0.45	0.64	0.64	0.54
206	3	KIF4A, LRIG2, TCF7	0.76	0.75	0.64	0.71	0.67	0.69	0.75	0.67	0.69	0.81	0.67	0.77	0.72	0.73	0.72	0.6	0.85	0.18	0.69	0.64	0.67	0.7	0.71	0.53
206	3	KIF4A, LRRC48, TTK	0.74	0.79	0.65	0.71	0.67	0.69	0.8	0.7	0.76	0.78	0.67	0.77	0.75	0.65	0.74	0.74	0.85	0.51	0.67	0.79	0.49
206	3	KIF4A, MCM4, TTK	0.75	0.79	0.67	0.7	0.67	0.74	0.77	0.67	0.78	0.81	0.75	0.76	0.73	0.65	0.77	0.63	0.62	0.63	0.67	0.76	0.55	0.67	0.64	0.6
206	3	KIF4A, MOSPD1, STARD13	0.76	0.67	0.76	0.74	0.7	0.79	0.81	0.7	0.86	0.77	0.75	0.7	0.72	0.69	0.65	0.26	0.92	0.37	0.36	0.76	0.51	0.66	0.7	0.57
206	3	KIF4A, MOSPD1, TTK	0.73	0.71	0.74	0.71	0.7	0.71	0.81	0.73	0.82	0.8	0.67	0.79	0.72	0.65	0.71	0.32	0.92	0.14	0.37	0.85	0.4	0.58	0.57	0.54
206	3	KIF4A, MTFR1, PARL	0.74	0.67	0.71	0.7	0.67	0.69	0.75	0.67	0.65	0.82	0.83	0.68	0.74	0.65	0.66	0.65	0.77	0.39	0.65	0.64	0.54	0.62	0.64	0.5
206	3	KIF4A, MTFR1, TTK	0.73	0.75	0.69	0.7	0.67	0.71	0.78	0.67	0.82	0.81	0.75	0.77	0.74	0.65	0.72	0.6	0.69	0.47	0.65	0.73	0.5	0.61	0.57	0.6
206	3	KIF4A, MZT2B, TTK	0.74	0.79	0.69	0.7	0.67	0.74	0.77	0.67	0.82	0.8	0.83	0.73	0.72	0.65	0.68	0.6	0.85	0.08	0.65	0.79	0.46	0.61	0.61	0.56
206	3	KIF4A, NDUFA6, RALA	0.72	0.75	0.67	0.76	0.67	0.79	0.78	0.7	0.73	0.81	0.92	0.65	0.77	0.65	0.81	0.75	0.92	0.2	0.7	0.58	0.7	0.57	0.55	0.53
206	3	KIF4A, PLK3, TCEB3-AS1	0.78	0.71	0.78	0.72	0.67	0.67	0.73	0.7	0.67	0.79	0.67	0.77	0.75	0.69	0.72	0.23	0.77	0.73	0.38	0.73	0.46
206	3	KIF4A, PLK3, TCF7	0.76	0.79	0.69	0.7	0.67	0.67	0.73	0.7	0.69	0.77	0.67	0.77	0.73	0.65	0.69	0.63	0.85	0.27	0.68	0.64	0.6	0.7	0.81	0.46
206	3	KIF4A, PLK3, TRIM66	0.76	0.71	0.75	0.7	0.67	0.71	0.74	0.73	0.71	0.77	0.67	0.76	0.75	0.69	0.72	0.7	0.77	0.41	0.64	0.7	0.52	0.64	0.59	0.56
206	3	KIF4A, PPAT, ZBTB40	0.77	0.75	0.62	0.75	0.67	0.71	0.76	0.67	0.71	0.82	0.83	0.67	0.72	0.65	0.65	0.59	0.62	0.65	0.71	0.67	0.68	0.59	0.51	0.59
206	3	KIF4A, RALA, TCEB3-AS1	0.72	0.79	0.61	0.74	0.7	0.71	0.78	0.7	0.78	0.83	0.92	0.67	0.75	0.65	0.71	0.76	0.92	0.16	0.7	0.61	0.69
206	3	KIF4A, RPAP3, TTK	0.74	0.79	0.68	0.7	0.67	0.74	0.77	0.67	0.82	0.79	0.83	0.7	0.72	0.69	0.7	0.69	0.85	0.35	0.61	0.82	0.45	0.63	0.63	0.56
206	3	KIF4A, RPAP3, ZBTB11	0.7	0.5	0.72	0.7	0.7	0.69	0.77	0.67	0.78	0.82	0.92	0.71	0.7	0.65	0.77	0.71	0.92	0.47	0.66	0.58	0.64	0.64	0.62	0.55
206	3	KIF4A, SMC3, TTK	0.74	0.79	0.68	0.7	0.67	0.74	0.77	0.67	0.82	0.8	0.75	0.74	0.73	0.65	0.72	0.3	0.85	0.43	0.38	0.82	0.46	0.64	0.65	0.54
206	3	KIF4A, SQLE, TTK	0.77	0.79	0.68	0.74	0.73	0.71	0.81	0.7	0.84	0.79	0.67	0.68	0.75	0.73	0.66	0.73	0.92	0.43	0.71	0.79	0.58	0.61	0.59	0.59
206	3	KIF4A, TBC1D31, TTK	0.74	0.75	0.71	0.7	0.7	0.74	0.78	0.7	0.8	0.81	0.83	0.7	0.73	0.69	0.7	0.72	0.69	0.49	0.67	0.67	0.58	0.61	0.56	0.58
206	3	MOSPD1, MTHFD2, SQLE	0.7	0.67	0.79	0.71	0.67	0.71	0.82	0.7	0.78	0.72	0.67	0.67	0.72	0.65	0.7	0.73	1	0.29	0.7	0.82	0.56	0.55	0.46	0.66
206	3	MOSPD1, STARD13, TTK	0.74	0.75	0.69	0.72	0.67	0.67	0.83	0.73	0.82	0.77	0.75	0.74	0.72	0.65	0.76	0.35	0.92	0.2	0.38	0.73	0.52	0.65	0.7	0.55
206	3	PRC1, SMC3, ZNF468	0.71	0.46	0.72	0.75	0.67	0.71	0.82	0.87	0.76	0.75	0.75	0.65	0.68	0.65	0.75	0.78	0.77	0.69	0.68	0.64	0.6	0.64	0.48	0.72
206	3	RRM2, SQLE, TTK	0.77	0.75	0.67	0.74	0.67	0.74	0.81	0.67	0.8	0.73	0.67	0.68	0.74	0.73	0.68	0.73	0.92	0.41	0.71	0.79	0.55	0.59	0.6	0.56
206	3	SNHG17, SPC25, SQLE	0.77	0.71	0.76	0.73	0.67	0.74	0.82	0.73	0.82	0.71	0.67	0.7	0.68	0.69	0.68	0.69	0.85	0.31	0.72	0.76	0.59	0.57	0.58	0.56
206	3	SNHG17, SQLE, WSB2	0.7	0.54	0.78	0.74	0.73	0.67	0.82	0.8	0.73	0.69	0.67	0.76	0.72	0.65	0.72	0.71	0.92	0.35	0.71	0.79	0.54	0.56	0.44	0.67
206	3	STARD13, TTK, UBE2C	0.76	0.75	0.68	0.72	0.7	0.74	0.82	0.73	0.84	0.77	0.75	0.7	0.7	0.65	0.74	0.73	0.85	0.55	0.61	0.73	0.49	0.65	0.71	0.55
72	4	APOBEC3B, AURKA, TTK, UBE2C	0.76	0.71	0.71	0.7	0.7	0.76	0.78	0.7	0.82	0.74	0.75	0.71	0.69	0.65	0.67	0.32	0.54	0.76	0.36	0.33	0.81	0.6	0.58	0.55
72	4	APOBEC3B, CCNB1, KIF4A, TTK	0.75	0.75	0.69	0.72	0.67	0.74	0.77	0.67	0.82	0.81	0.83	0.74	0.72	0.65	0.72	0.71	0.85	0.37	0.64	0.73	0.5	0.61	0.54	0.6
72	4	APOBEC3B, CDS1, KIF4A, RALA	0.72	0.79	0.64	0.74	0.73	0.69	0.79	0.67	0.8	0.81	0.92	0.68	0.76	0.65	0.7	0.77	0.92	0.12	0.7	0.64	0.66	0.6	0.56	0.57
72	4	APOBEC3B, CENPF, KIF4A, TTK	0.75	0.79	0.71	0.71	0.7	0.74	0.77	0.67	0.8	0.8	0.83	0.71	0.73	0.69	0.71	0.68	0.85	0.43	0.68	0.76	0.5	0.6	0.53	0.59
72	4	APOBEC3B, DLGAP5, NUSAP1, TTK	0.75	0.71	0.72	0.7	0.67	0.71	0.78	0.7	0.78	0.81	0.83	0.74	0.72	0.65	0.8	0.74	0.92	0.35	0.65	0.73	0.5	0.6	0.55	0.58
72	4	APOBEC3B, DTL, KIF4A, TTK	0.75	0.79	0.69	0.7	0.7	0.74	0.78	0.7	0.8	0.81	0.83	0.73	0.74	0.65	0.73	0.72	0.92	0.29	0.63	0.82	0.4	0.6	0.56	0.58
72	4	APOBEC3B, DTL, TTK, UBE2C	0.75	0.71	0.71	0.71	0.67	0.74	0.78	0.7	0.84	0.77	0.75	0.74	0.71	0.65	0.76	0.3	0.92	0.33	0.37	0.7	0.43	0.58	0.56	0.58
72	4	APOBEC3B, ECHDC2, EGOT, KIF4A	0.73	0.79	0.61	0.74	0.67	0.69	0.78	0.73	0.82	0.78	0.67	0.76	0.73	0.65	0.69	0.73	0.85	0.51	0.68	0.73	0.58
72	4	APOBEC3B, ECHDC2, KIF4A, TTK	0.75	0.83	0.65	0.72	0.7	0.76	0.76	0.67	0.84	0.79	0.67	0.7	0.73	0.65	0.69	0.73	0.85	0.41	0.64	0.67	0.54	0.58	0.54	0.56
72	4	APOBEC3B, ECT2, KIF4A, TTK	0.74	0.79	0.69	0.71	0.67	0.74	0.77	0.67	0.82	0.8	0.75	0.73	0.72	0.65	0.71	0.31	0.85	0.33	0.39	0.76	0.45	0.61	0.57	0.55
72	4	APOBEC3B, EGOT, KIF14, KIF4A	0.73	0.71	0.69	0.74	0.73	0.69	0.79	0.7	0.76	0.77	0.75	0.76	0.71	0.65	0.67	0.74	0.85	0.51	0.67	0.7	0.55
72	4	APOBEC3B, EGOT, KIF4A, MELK	0.73	0.71	0.69	0.74	0.7	0.69	0.8	0.77	0.78	0.76	0.75	0.77	0.71	0.65	0.66	0.76	0.85	0.49	0.67	0.85	0.52
72	4	APOBEC3B, EGOT, KIF4A, ZBTB40	0.73	0.71	0.69	0.74	0.73	0.69	0.77	0.67	0.78	0.77	0.67	0.77	0.71	0.65	0.66	0.62	0.54	0.63	0.72	0.73	0.64
72	4	APOBEC3B, EPN3, NUSAP1, TTK	0.78	0.71	0.75	0.74	0.7	0.69	0.81	0.77	0.82	0.82	0.92	0.65	0.69	0.65	0.77	0.23	0.92	0.59	0.32	0.36	0.86	0.64	0.59	0.64
72	4	APOBEC3B, KIF18A, KIF4A, TTK	0.75	0.75	0.72	0.71	0.7	0.74	0.78	0.67	0.8	0.79	0.75	0.77	0.72	0.65	0.71	0.69	0.85	0.49	0.63	0.64	0.51	0.61	0.55	0.55
72	4	APOBEC3B, KIF20A, TTK, UBE2C	0.74	0.71	0.71	0.71	0.7	0.74	0.78	0.67	0.84	0.76	0.75	0.73	0.7	0.65	0.74	0.7	0.92	0.43	0.62	0.79	0.45	0.62	0.7	0.43
72	4	APOBEC3B, KIF2C, KIF4A, TTK	0.74	0.75	0.71	0.71	0.73	0.74	0.77	0.67	0.82	0.8	0.75	0.73	0.72	0.65	0.71	0.29	0.69	0.69	0.37	0.33	0.76	0.6	0.57	0.57
72	4	APOBEC3B, KIF4A, MCM4, TTK	0.74	0.75	0.67	0.7	0.7	0.74	0.77	0.67	0.8	0.81	0.75	0.73	0.73	0.65	0.72	0.68	0.77	0.39	0.66	0.82	0.48	0.69	0.65	0.61
72	4	APOBEC3B, KIF4A, MELK, TTK	0.74	0.75	0.69	0.69	0.67	0.74	0.78	0.67	0.8	0.8	0.83	0.73	0.73	0.69	0.71	0.25	0.85	0.71	0.37	0.33	0.76	0.59	0.57	0.56
72	4	APOBEC3B, KIF4A, TTK, UBE2C	0.75	0.75	0.71	0.71	0.67	0.71	0.77	0.7	0.8	0.77	0.75	0.71	0.71	0.65	0.68	0.71	0.85	0.39	0.62	0.73	0.44	0.61	0.57	0.55
72	4	BUB1B, EGOT, HSPD1, MCM4	0.73	0.58	0.78	0.75	0.73	0.71	0.82	0.77	0.69	0.72	0.67	0.74	0.71	0.65	0.82	0.74	0.85	0.57	0.72	0.73	0.68
72	4	C1orf123, EGOT, KIF4A, TTK	0.72	0.71	0.65	0.77	0.76	0.71	0.81	0.73	0.73	0.79	0.67	0.8	0.75	0.65	0.74	0.71	0.77	0.57	0.65	0.73	0.53
72	4	CCNB1, DTL, EGOT, KIF4A	0.74	0.71	0.68	0.74	0.7	0.69	0.78	0.77	0.76	0.77	0.75	0.74	0.71	0.65	0.65	0.72	0.85	0.49	0.68	0.7	0.59
72	4	CCNB1, EGOT, KIF4A, MELK	0.73	0.71	0.69	0.74	0.7	0.69	0.8	0.77	0.78	0.76	0.75	0.77	0.71	0.65	0.66	0.76	0.85	0.55	0.67	0.61	0.66
72	4	CCNB1, HSPD1, KIF4A, RALA	0.64	0.58	0.67	0.8	0.7	0.74	0.78	0.73	0.69	0.79	0.67	0.76	0.74	0.65	0.72	0.23	0.92	0.41	0.3	0.48	0.81	0.59	0.54	0.59
72	4	CCNB2, CDK1, KIF4A, NCAPG	0.76	0.71	0.78	0.69	0.67	0.71	0.78	0.73	0.65	0.78	0.75	0.68	0.69	0.65	0.68	0.64	0.85	0.37	0.72	0.79	0.64	0.7	0.66	0.61
72	4	CCNB2, DLGAP5, HN1, KIF4A	0.77	0.75	0.74	0.69	0.67	0.71	0.77	0.73	0.65	0.8	0.83	0.68	0.71	0.73	0.68	0.25	0.85	0.47	0.36	0.61	0.58
72	4	CCNB2, DLGAP5, KIF4A, ZBTB40	0.77	0.79	0.68	0.71	0.67	0.69	0.77	0.73	0.65	0.79	0.92	0.7	0.72	0.69	0.7	0.6	0.46	0.67	0.76	0.7	0.71	0.59	0.56	0.58
72	4	CCNB2, DTL, ECT2, KIF4A	0.77	0.71	0.76	0.69	0.67	0.71	0.78	0.73	0.65	0.79	0.83	0.67	0.69	0.69	0.65	0.74	0.92	0.45	0.66	0.76	0.56	0.61	0.63	0.54
72	4	CCNB2, KIF4A, PDSS1, TOP2A	0.77	0.71	0.72	0.73	0.67	0.69	0.81	0.67	0.78	0.73	0.67	0.7	0.7	0.65	0.69	0.7	0.92	0.45	0.68	0.82	0.52	0.61	0.62	0.53
72	4	CCNB2, KIF4A, ZBTB40, ZNF500	0.77	0.79	0.68	0.71	0.67	0.71	0.76	0.7	0.65	0.79	0.75	0.7	0.7	0.65	0.7	0.67	0.54	0.8	0.72	0.42	0.83	0.58	0.56	0.55
72	4	CDK1, ECHDC2, EGOT, KIF4A	0.72	0.79	0.67	0.75	0.67	0.69	0.78	0.73	0.78	0.77	0.67	0.76	0.72	0.65	0.68	0.25	0.85	0.51	0.33	0.67	0.59
72	4	CDK1, ECT2, EGOT, KIF4A	0.73	0.71	0.69	0.74	0.67	0.69	0.79	0.73	0.76	0.77	0.67	0.74	0.7	0.69	0.65	0.73	0.77	0.57	0.67	0.7	0.61
72	4	CDK1, EGOT, KIF4A, MELK	0.73	0.71	0.69	0.74	0.7	0.69	0.8	0.77	0.78	0.76	0.75	0.77	0.71	0.65	0.66	0.77	0.85	0.49	0.66	0.73	0.56
72	4	CDK1, EGOT, KIF4A, TOP2A	0.73	0.71	0.68	0.73	0.67	0.67	0.79	0.77	0.76	0.77	0.75	0.74	0.71	0.69	0.65	0.71	0.85	0.51	0.67	0.73	0.52
72	4	CDS1, DNAJC9, KIAA0895, KIF4A	0.7	0.54	0.79	0.75	0.67	0.79	0.84	0.8	0.69	0.81	0.83	0.67	0.67	0.65	0.69	0.73	0.85	0.41	0.64	0.76	0.51	0.65	0.57	0.6
72	4	CDS1, ECT2, KIF4A, RALA	0.73	0.75	0.68	0.74	0.7	0.71	0.78	0.7	0.8	0.82	0.92	0.67	0.76	0.69	0.67	0.77	0.92	0.2	0.7	0.61	0.71	0.68	0.6	0.65
72	4	CDS1, EGOT, KIAA0895, KIF4A	0.7	0.58	0.78	0.78	0.7	0.71	0.84	0.77	0.76	0.8	0.67	0.71	0.69	0.65	0.68	0.73	0.77	0.53	0.67	0.79	0.58
72	4	CDS1, EGOT, KIF4A, NEK2	0.73	0.75	0.65	0.74	0.7	0.69	0.78	0.7	0.78	0.79	0.75	0.76	0.71	0.65	0.66	0.72	0.85	0.51	0.68	0.79	0.55
72	4	CDS1, EGOT, KIF4A, ZNF500	0.72	0.75	0.64	0.74	0.73	0.67	0.78	0.7	0.78	0.78	0.67	0.74	0.71	0.65	0.66	0.74	0.69	0.57	0.68	0.64	0.61
72	4	CDS1, KIF4A, RALA, YTHDF3	0.71	0.71	0.65	0.73	0.7	0.74	0.78	0.7	0.84	0.81	0.92	0.68	0.75	0.65	0.8	0.74	0.92	0.18	0.71	0.67	0.64	0.6	0.56	0.56
72	4	CDS1, KIF4A, RALA, ZBTB40	0.73	0.71	0.69	0.74	0.7	0.71	0.79	0.73	0.8	0.81	0.92	0.67	0.75	0.65	0.65	0.66	0.85	0.35	0.75	0.7	0.66	0.62	0.55	0.59
72	4	CDS1, KIF4A, RALA, ZNF500	0.73	0.71	0.67	0.74	0.7	0.71	0.78	0.7	0.8	0.81	0.92	0.67	0.75	0.65	0.67	0.77	0.92	0.24	0.71	0.64	0.68	0.61	0.6	0.54
72	4	CENPF, ECT2, KIF4A, RALA	0.74	0.75	0.65	0.74	0.67	0.71	0.78	0.73	0.8	0.82	0.92	0.67	0.75	0.65	0.68	0.72	0.92	0.27	0.71	0.76	0.6	0.59	0.59	0.53
72	4	CENPF, EGOT, KIF4A, TOP2A	0.73	0.75	0.71	0.74	0.73	0.67	0.81	0.77	0.76	0.76	0.75	0.76	0.72	0.65	0.66	0.31	0.69	0.65	0.32	0.67	0.61
72	4	CEP55, ECT2, KIF4A, MED1	0.76	0.75	0.76	0.69	0.7	0.71	0.77	0.67	0.78	0.77	0.83	0.68	0.71	0.69	0.67	0.73	0.85	0.53	0.65	0.64	0.6	0.71	0.67	0.67
72	4	DLGAP5, ECT2, KIF20A, KIF4A	0.77	0.75	0.72	0.69	0.67	0.74	0.78	0.8	0.65	0.81	0.92	0.73	0.74	0.77	0.68	0.26	0.85	0.69	0.39	0.36	0.79	0.61	0.66	0.48
72	4	DLGAP5, ECT2, KIF4A, NEK2	0.78	0.79	0.74	0.69	0.67	0.71	0.78	0.73	0.65	0.8	0.92	0.68	0.74	0.69	0.65	0.27	0.85	0.65	0.38	0.36	0.76	0.62	0.59	0.58
72	4	DLGAP5, EPN3, KIF4A, UBE2C	0.79	0.75	0.79	0.73	0.67	0.74	0.8	0.73	0.67	0.81	0.92	0.67	0.67	0.65	0.66	0.23	0.92	0.51	0.34	0.52	0.67	0.64	0.63	0.6
72	4	DTL, ECT2, KIF4A, PDSS1	0.78	0.67	0.74	0.76	0.67	0.69	0.78	0.67	0.82	0.75	0.75	0.73	0.7	0.65	0.68	0.25	0.92	0.41	0.36	0.76	0.51	0.62	0.68	0.51
72	4	ECHDC2, ECT2, KIF4A, ZBTB40	0.75	0.88	0.58	0.74	0.67	0.74	0.73	0.67	0.69	0.8	0.75	0.74	0.74	0.65	0.68	0.64	0.54	0.75	0.69	0.58	0.78	0.59	0.58	0.5
72	4	ECHDC2, EGOT, KIF4A, TOP2A	0.72	0.79	0.64	0.75	0.67	0.69	0.78	0.73	0.78	0.77	0.75	0.77	0.73	0.65	0.68	0.72	0.85	0.55	0.68	0.7	0.58
72	4	ECHDC2, EGOT, KIF4A, ZBTB40	0.73	0.83	0.46	0.76	0.76	0.69	0.75	0.73	0.76	0.8	0.83	0.8	0.74	0.69	0.72	0.63	0.62	0.65	0.71	0.67	0.68
72	4	ECHDC2, KIF2C, LRRC48, ZNF500	0.72	0.92	0.39	0.7	0.67	0.69	0.78	0.73	0.69	0.71	0.67	0.77	0.75	0.65	0.71	0.74	0.77	0.57	0.69	0.76	0.59
72	4	ECHDC2, KIF4A, NUSAP1, TTK	0.76	0.79	0.67	0.7	0.67	0.69	0.78	0.73	0.76	0.81	0.83	0.71	0.73	0.65	0.75	0.77	0.85	0.47	0.65	0.61	0.57	0.6	0.55	0.59
72	4	ECHDC2, KIF4A, RALA, ZBTB40	0.72	0.83	0.57	0.74	0.7	0.69	0.79	0.73	0.8	0.82	1	0.65	0.75	0.65	0.7	0.65	0.85	0.41	0.76	0.7	0.68	0.56	0.53	0.54
72	4	ECHDC2, TOP2A, TTK, UBE2C	0.74	0.75	0.68	0.71	0.67	0.71	0.78	0.67	0.82	0.76	0.67	0.74	0.69	0.65	0.69	0.69	0.85	0.51	0.65	0.7	0.57	0.58	0.6	0.5
72	4	ECT2, EGOT, KIF4A, TOP2A	0.73	0.71	0.67	0.73	0.73	0.67	0.78	0.7	0.78	0.77	0.75	0.76	0.71	0.65	0.66	0.7	0.85	0.47	0.67	0.85	0.46
72	4	ECT2, KIF4A, LRRC48, ZNF468	0.71	0.62	0.72	0.76	0.7	0.71	0.82	0.77	0.67	0.73	0.67	0.71	0.7	0.73	0.65	0.75	0.77	0.69	0.69	0.7	0.56
72	4	EGOT, HSPD1, KIF4A, TTK	0.71	0.75	0.65	0.78	0.79	0.67	0.82	0.77	0.73	0.79	0.75	0.74	0.72	0.65	0.72	0.71	0.85	0.51	0.69	0.64	0.7
72	4	EGOT, HSPD1, KIF4A, UBE2C	0.74	0.71	0.69	0.77	0.67	0.81	0.81	0.77	0.73	0.78	0.67	0.76	0.72	0.65	0.73	0.72	0.85	0.51	0.68	0.64	0.7
72	4	EGOT, HSPD1, NEK2, PRC1	0.73	0.62	0.76	0.77	0.7	0.79	0.84	0.83	0.73	0.73	0.67	0.76	0.73	0.65	0.77	0.76	0.85	0.51	0.7	0.67	0.67
72	4	EGOT, KIAA0895, KIF4A, LRRC48	0.7	0.71	0.61	0.76	0.73	0.69	0.85	0.83	0.73	0.8	0.75	0.74	0.74	0.69	0.72	0.76	0.77	0.65	0.71	0.79	0.61
72	4	EGOT, KIF4A, MED1, MELK	0.73	0.71	0.68	0.73	0.7	0.69	0.8	0.77	0.78	0.76	0.75	0.77	0.72	0.65	0.66	0.75	0.77	0.61	0.68	0.7	0.58
72	4	EGOT, KIF4A, MELK, TOP2A	0.73	0.71	0.68	0.73	0.7	0.69	0.8	0.77	0.78	0.77	0.75	0.77	0.71	0.65	0.67	0.7	0.69	0.61	0.68	0.79	0.57
72	4	EGOT, KIF4A, NEK2, TOP2A	0.73	0.75	0.67	0.73	0.73	0.67	0.78	0.7	0.78	0.77	0.75	0.76	0.71	0.65	0.66	0.7	0.85	0.53	0.67	0.85	0.51
72	4	EPN3, HN1, KIF4A, UBE2C	0.79	0.75	0.81	0.73	0.67	0.76	0.78	0.7	0.73	0.82	0.83	0.67	0.65	0.65	0.65	0.75	0.92	0.31	0.69	0.67	0.62
72	4	HN1, KIF4A, RALA, ZBTB40	0.73	0.75	0.62	0.74	0.73	0.69	0.79	0.73	0.73	0.84	0.92	0.65	0.75	0.65	0.74	0.66	0.85	0.41	0.75	0.67	0.69
72	4	HN1, KIF4A, RALA, ZNF500	0.73	0.71	0.65	0.74	0.67	0.69	0.78	0.7	0.76	0.83	0.92	0.67	0.75	0.65	0.74	0.76	0.92	0.24	0.72	0.79	0.6
72	4	KIF20A, KIF4A, MED1, ZNF500	0.77	0.75	0.71	0.7	0.67	0.71	0.75	0.73	0.65	0.79	0.92	0.7	0.73	0.69	0.7	0.69	0.62	0.76	0.66	0.52	0.7	0.61	0.59	0.53
72	4	KIF20A, KIF4A, ZNF500, ZWILCH	0.76	0.75	0.74	0.71	0.67	0.71	0.75	0.73	0.69	0.8	0.83	0.67	0.73	0.65	0.7	0.36	0.69	0.57	0.33	0.42	0.73	0.64	0.62	0.6
72	4	KIF2C, KIF4A, NUSAP1, ZBTB40	0.77	0.79	0.67	0.71	0.67	0.69	0.76	0.73	0.67	0.81	0.92	0.7	0.73	0.65	0.71	0.6	0.62	0.59	0.73	0.7	0.65	0.62	0.55	0.59
72	4	KIF4A, LRRC48, NEK2, TTK	0.74	0.79	0.65	0.71	0.67	0.71	0.8	0.7	0.78	0.78	0.67	0.76	0.75	0.65	0.72	0.74	0.77	0.55	0.69	0.76	0.54
72	4	KIF4A, MED1, NUSAP1, ZBTB40	0.77	0.79	0.67	0.71	0.67	0.69	0.76	0.73	0.67	0.8	0.92	0.65	0.71	0.65	0.68	0.64	0.69	0.67	0.72	0.7	0.7	0.63	0.57	0.6
72	4	KIF4A, MELK, RALA, YTHDF3	0.68	0.83	0.62	0.72	0.67	0.71	0.8	0.7	0.78	0.83	0.92	0.7	0.75	0.65	0.83	0.74	0.92	0.27	0.7	0.7	0.62	0.56	0.57	0.49
72	4	KIF4A, NEK2, SPC25, TTK	0.74	0.79	0.67	0.69	0.67	0.74	0.78	0.67	0.82	0.79	0.67	0.73	0.72	0.65	0.72	0.3	0.85	0.55	0.37	0.42	0.7	0.6	0.56	0.58
72	4	KIF4A, NUSAP1, TOP2A, ZBTB40	0.77	0.79	0.67	0.71	0.67	0.69	0.76	0.77	0.67	0.81	0.92	0.65	0.73	0.65	0.69	0.56	0.54	0.57	0.74	0.64	0.74	0.63	0.57	0.6
72	4	KIF4A, SPC25, TOP2A, TTK	0.75	0.75	0.68	0.69	0.67	0.74	0.78	0.67	0.84	0.8	0.75	0.74	0.72	0.65	0.74	0.32	0.85	0.59	0.37	0.42	0.69	0.58	0.57	0.54
72	4	KIF4A, TOP2A, TTK, UBE2C	0.75	0.75	0.71	0.71	0.7	0.74	0.79	0.7	0.8	0.78	0.83	0.74	0.7	0.65	0.69	0.67	0.85	0.49	0.64	0.76	0.51	0.58	0.56	0.56
42	5	CCNB1, HSPD1, NUSAP1, PDSS1, TTK	0.72	0.62	0.78	0.79	0.73	0.79	0.81	0.73	0.9	0.75	0.67	0.79	0.72	0.65	0.85	0.26	0.85	0.41	0.35	0.61	0.63	0.59	0.53	0.59
42	5	CCNB1, HSPD1, NUSAP1, TTK, UBE2C	0.68	0.62	0.69	0.79	0.7	0.79	0.8	0.7	0.88	0.75	0.67	0.8	0.7	0.65	0.8	0.25	0.85	0.43	0.35	0.67	0.61	0.59	0.58	0.55
42	5	CCNB2, KIF20A, TOP2A, TTK, UBE2C	0.74	0.75	0.64	0.7	0.7	0.74	0.8	0.73	0.76	0.77	0.83	0.71	0.67	0.65	0.66	0.63	0.69	0.37	0.71	0.73	0.64	0.6	0.68	0.45
42	5	CCNB2, PBK, TOP2A, TTK, UBE2C	0.75	0.75	0.69	0.7	0.67	0.74	0.8	0.73	0.78	0.77	0.75	0.73	0.68	0.65	0.69	0.68	0.92	0.35	0.65	0.79	0.5	0.6	0.62	0.5
42	5	EGOT, HSPD1, NEK2, PRC1, ZWINT	0.73	0.58	0.76	0.76	0.67	0.76	0.85	0.83	0.69	0.73	0.67	0.76	0.72	0.65	0.8	0.74	0.85	0.51	0.7	0.64	0.69
42	5	EGOT, HSPD1, NUSAP1, TOMM70A, UBE2C	0.74	0.71	0.65	0.77	0.67	0.79	0.83	0.8	0.65	0.77	0.83	0.73	0.73	0.69	0.79	0.26	0.92	0.35	0.3	0.73	0.63
42	5	KIF2C, MELK, TOP2A, TTK, UBE2C	0.75	0.75	0.69	0.7	0.7	0.74	0.81	0.7	0.78	0.75	0.83	0.71	0.68	0.69	0.7	0.28	0.85	0.45	0.35	0.76	0.48	0.59	0.68	0.45
42	5	KIF2C, SPC25, TOP2A, TTK, UBE2C	0.75	0.75	0.68	0.69	0.7	0.71	0.79	0.7	0.84	0.76	0.67	0.71	0.67	0.65	0.68	0.31	0.85	0.49	0.36	0.7	0.55	0.59	0.69	0.43
30	6	HSPD1, MRPS17, NUSAP1, SMC4, TOP2A, TTK	0.72	0.71	0.65	0.77	0.67	0.74	0.81	0.73	0.78	0.7	0.67	0.74	0.71	0.65	0.79	0.79	1	0.22	0.69	0.76	0.64	0.55	0.57	0.52
25	7	HSPD1, KIF20A, MAD2L1, NUSAP1, RACGAP1, TOMM70A, TTK	0.67	0.62	0.72	0.79	0.67	0.81	0.78	0.7	0.86	0.77	0.67	0.76	0.73	0.65	0.85	0.74	0.92	0.24	0.69	0.67	0.63
21	9	ASPM, CENPN, CEP55, HSPD1, KIF11, PRC1, RACGAP1, TOP2A, TTK	0.7	0.62	0.79	0.78	0.67	0.69	0.8	0.7	0.8	0.73	0.75	0.77	0.72	0.65	0.81	0.74	0.85	0.43	0.66	0.7	0.63	0.6	0.48	0.7
21	10	ASPM, HSPD1, KIF2C, MRPS17, NUSAP1, PRC1, RACGAP1, SMC4, TOP2A, TTK	0.72	0.67	0.68	0.77	0.67	0.76	0.82	0.73	0.82	0.72	0.67	0.76	0.71	0.65	0.78	0.8	1	0.22	0.71	0.67	0.63	0.56	0.56	0.58
21	11	ASPM, HSPD1, KIF14, KIF2C, MRPS17, NUSAP1, PRC1, RACGAP1, SMC4, TOP2A, TTK	0.72	0.71	0.65	0.77	0.67	0.76	0.82	0.73	0.8	0.73	0.67	0.76	0.71	0.69	0.78	0.79	0.92	0.35	0.69	0.73	0.62	0.56	0.54	0.6

## Sheet: The 8-gene signature
k	Signature	GSE1456, AUC	GSE1456, TPR	GSE1456, TNR	GSE3494, AUC	GSE3494, TPR	GSE3494, TNR	GSE6532, AUC	GSE6532, TPR	GSE6532, TNR	GSE12093, AUC	GSE12093, TPR	GSE12093, TNR	GSE17705, AUC	GSE17705, TPR	GSE17705, TNR	GSE6532, AUC	GSE6532, TPR	GSE6532, TNR	GSE20685, AUC	GSE20685, TPR	GSE20685, TNR	TCGA-BRCA, AUC	TCGA-BRCA, TPR	TCGA-BRCA, TNR
8	CDK1, FOXM1, LRIG2, MSH2, PLK1, RACGAP1, RRM2, TMPO	0.78	0.67	0.71	0.68	0.67	0.79	0.82	0.87	0.71	0.79	0.75	0.65	0.68	0.65	0.66	0.72	0.69	0.67	0.74	0.67	0.73	0.72	0.61	0.73
7	CDK1, FOXM1, MSH2, PLK1, RACGAP1, RRM2, TMPO	0.77	0.67	0.67	0.69	0.64	0.71	0.82	0.77	0.73	0.77	0.92	0.58	0.65	0.81	0.51	0.74	0.77	0.57	0.74	0.7	0.72	0.73	0.62	0.73
7	CDK1, FOXM1, LRIG2, PLK1, RACGAP1, RRM2, TMPO	0.78	0.62	0.78	0.67	0.52	0.76	0.81	0.7	0.67	0.79	0.58	0.71	0.69	0.38	0.8	0.77	0.46	0.82	0.73	0.64	0.72	0.73	0.62	0.73
7	CDK1, FOXM1, LRIG2, MSH2, PLK1, RACGAP1, RRM2	0.78	0.67	0.72	0.68	0.58	0.79	0.84	0.83	0.69	0.77	0.83	0.65	0.68	0.69	0.64	0.68	0.85	0.49	0.74	0.61	0.71	0.65	0.55	0.64
